# Supplementary material
Source: PubMed Central journal article supplement (PMC2777616)
Supplement: NIHMS153881-supplement-supp1.pdf [file NIHMS153881-supplement-supp1.pdf]

## **SUPPLEMENTAL MATERIAL**

### **Detailed Methods**

#### **Human CPCs**

As previously described, samples of human myocardium discarded at surgery (n = 6) were utilized to isolate, expand and characterize c-kit-positive human cardiac progenitor cells (hCPCs) (1). Briefly, specimens were enzymatically dissociated in a solution containing collagenase to obtain a single cell suspension (1). Cells were sorted with magnetic immunobeads for c-kit (Miltenyi) and the cell phenotype was defined by immunolabeling (1). Human CPCs were then cultured in F12 medium (Gibco) supplemented with 5-10% FBS (Gibco) and insulin-selenium-transferrin mixture (Sigma). At P3-P6, cells were characterized by FACS to document their undifferentiated state (1). Cells were fixed in 4% paraformaldehyde for 15 min and tested for markers of cardiac and hematopoietic cell lineages (1, 2).

#### **Cell Cycle Synchronization**

hCPCs were incubated for 24 h with mimosine (synchronization at G1-S transition, 500  $\mu\text{mol/L}$ ; Sigma) or demecolcine (synchronization at G2-M transition, 20 ng/ml; Sigma) (3, 4). Subsequently, cells were suspended, washed in PBS and fixed in ice-cold ethanol (70%) for 2 h. Nuclei were stained by propidium iodide (20 $\mu\text{g/ml}$ ; Sigma), Triton X-100 (0.1%; Sigma) and RNase A (10mg/ml; Sigma) for 1 h. The distribution of non-synchronized and synchronized hCPCs in the cell cycle was determined by fluorescence activated cell sorting (BD FACS Aria High Speed Sorter SORP System™) and the percentage of cells in G1, S and G2 was determined by ModFit LT™ software. Additionally, non-synchronized control hCPCs and hCPCs treated with mimosine and demecolcine were analyzed physiologically.

#### **Ca<sup>2+</sup> Oscillations in hCPCs**

hCPCs were loaded with 10  $\mu\text{mol/L}$  Fluo-3 AM (Invitrogen) and placed on the stage of a two-photon microscope (BX51WI Olympus microscope coupled with a Bio-Rad Radiance 2100MP system). Cells were bathed with a Tyrode solution containing (mmol/L): NaCl 140, KCl 5.4, MgCl<sub>2</sub> 1, HEPES 5, Glucose 5.5 and CaCl<sub>2</sub> 2.0 (pH 7.4, adjusted with NaOH). Fluo-3 was excited at 900-960 nm wavelength with mode-locked Ti:sapphire femtosecond laser (Tsunami, Spectra-Physics) and the emission signal was collected at 535 nm. Series of images were acquired at 10 sec intervals for a period of 33 min. Changes of intracellular Ca<sup>2+</sup> in individual hCPCs were determined by measuring the fluorescent signal of Fluo-3. In each cell, the oscillations in fluorescence with time were graphically visualized utilizing ImageJ and

Microsoft Office Excel. These traces were employed to assess the number, amplitude and duration of  $\text{Ca}^{2+}$  oscillations in hCPCs. Fluo-3 signals were expressed as normalized fluorescence ( $F/F_0$ ). The duration of  $\text{Ca}^{2+}$  oscillations was measured from the onset of the rising phase to the return to baseline.

The effects of hCPC coupling and uncoupling on  $\text{Ca}^{2+}$  oscillations (5, 6) were determined in the presence of the connexin hemi-gap junction channel blocker octanol (1 mmol/L; Sigma). Additionally, thimerosal (10  $\mu\text{mol/L}$ , Sigma) was utilized to enhance the affinity of IP3Rs to IP3 (4, 7); IP3R function was inhibited (5, 9, 9) with 2-APB (2-aminoethyl diphenylborinate, 75  $\mu\text{mol/L}$ ; Sigma) and xestospongin-C (10  $\mu\text{mol/L}$ ; Sigma) and SERCA (10, 11) with CPA (cyclopiazonic acid, 10  $\mu\text{mol/L}$ ; Sigma). PLC activity was attenuated (12, 13) with U-73122 (2  $\mu\text{mol/L}$ ; Sigma) while caffeine (10 mmol/L; Sigma) and ryanodine (10  $\mu\text{mol/L}$ ; MP Biomedicals) were used to modulate RyR channels (4, 14-16). Purinoreceptors, H1 receptors and IGF-1R were activated with ATP (10  $\mu\text{mol/L}$ ; Sigma), histamine (100  $\mu\text{mol/L}$ ; Sigma), and IGF-1 (200 ng/ml; PeproTech), respectively. Finally, thapsigargin (10  $\mu\text{mol/L}$ ; Sigma) was introduced to deplete ER  $\text{Ca}^{2+}$  stores (11), lanthanum (0.1 mmol/L; Sigma) and SKF-96365 (0.1 mmol/L; Sigma) to block SOC (11, 17, 18, 19), KB-R7943 (100  $\mu\text{mol/L}$ ; Tocris) to inhibit forward mode NCX (20, 21) and carboxyeosin (5  $\mu\text{mol/L}$ ; Sigma) to prevent PMCA function (21, 22).

In co-culture experiments, hCPCs were plated with rat neonatal ventricular myocytes (purity: >90%) and were labeled with 1-2  $\mu\text{mol/L}$  red fluorescent dye 1,1'-dilinoleyl-3,3',3'-tetramethylindocarbocyanine (DiI, Invitrogen) for 5 min at 37°C and then for 15 min at room temperature (1, 23, 24). Fluo-3 loaded myocytes (1, 24) and DiI labeled hCPCs were analyzed by series of images (5 sec sampling rate) or by line-scan mode (2 ms sampling rate) (1, 24). Cells were field stimulated with platinum electrodes utilizing a Grass S88 stimulator (Astro-Med Industrial Park) in the absence and presence of 0.2 mmol/L cadmium chloride to inhibit  $I_{\text{CaL}}$  (1, 2, 14, 16, 24).

### **Dye Transfer Assay**

hCPCs were microinjected (FemtoJet, Eppendorf AG) with a medium containing in mmol/L: 27  $\text{K}_2\text{HPO}_4$ , 8  $\text{NaHPO}_4$ , 26  $\text{KH}_2\text{PO}_4$ , 1 mg/ml cascade blue (Invitrogen) and 0.3 mg/ml of the high-molecular-mass (70,000) rhodamine-labeled dextran (Invitrogen) (24, 25, 26). Transfer of the fluorescent dye to neighboring cells was followed by acquisition of subsequent images using an inverted epifluorescence microscope (IX-71, Olympus). This analysis was performed in 5 independent preparations.

In a second assay, cell-to-cell coupling was assessed by co-culture of calcein loaded hCPCs with non-loaded hCPCs or neonatal myocytes. hCPCs were labeled with 1-2  $\mu\text{mol/L}$  DiI and loaded with 5  $\mu\text{mol/L}$  calcein-acetoxymethyl ester (Invitrogen) prior to co-culture. Since DiI is incorporated permanently into the cell membrane, the presence of green fluorescence in DiI-negative cells was considered indicative of the transfer of calcein from loaded hCPCs to non-loaded cells via functional gap junctions. This analysis was performed by two photon microscopy (1, 23, 24). Nuclei in living cells were labeled with 10  $\mu\text{M}$  Hoechst 33258 dye (Sigma) (15). Images were acquired and utilized to measure by ImageJ software the level of fluorescence of calcein in DiI-positive hCPCs and neighboring and distant DiI-negative cells.

### **Mouse Myocytes and CPCs**

All animal experiments were approved by the local animal care committee (IACUC). C57BL/6 mice (Jackson Laboratory) and transgenic mice expressing EGFP under the control of the c-kit promoter (c-kit-EGFP mouse) (27) or under the control of the  $\alpha$ -myosin heavy chain promoter (MHC-EGFP mouse) (24) were anesthetized with sodium pentobarbital (50 mg/kg body weight, i.p.), the heart was excised and cardiac cells were enzymatically dissociated (14, 16, 24, 28). Briefly, the myocardium was perfused retrogradely through the aorta at 37°C with a  $\text{Ca}^{2+}$ -free solution gassed with 85%  $\text{O}_2$  and 15%  $\text{N}_2$ . After 5 minutes, 0.1 mmol/L  $\text{CaCl}_2$ , 274 units/ml collagenase (type 2, Worthington Biochemical Corp) and 0.57 units/ml protease (Type XIV, Sigma) were added to the solution which contained in mmol/L: NaCl 126, KCl 4.4,  $\text{MgCl}_2$  5, HEPES 5, Glucose 22, Taurine 20, Creatine 5, Na Pyruvate 5 and  $\text{NaH}_2\text{PO}_4$  5 (pH 7.4). At completion of digestion, the left ventricular (LV) myocardium was cut in small pieces and re-suspended in  $\text{Ca}^{2+}$  0.1 mmol/L solution and myocytes and small cells were collected separately. LV myocytes from C57BL/6 mice were utilized for measurement of L-type  $\text{Ca}^{2+}$  current (14, 16, 24, 28). Cardiomyocytes from transgenic MHC-EGFP mice were loaded with the  $\text{Ca}^{2+}$  indicator Rhod-2 (10  $\mu\text{M}$ ; Invitrogen) and emission spectra for EGFP and Rhod-2 were analyzed by Zeiss LSM 510 META confocal microscope. Moreover, myocytes were bathed with a Tyrode solution and electrically stimulated.  $\text{Ca}^{2+}$  transients were acquired by two-photon microscopy working in line-scan mode (1, 24). EGFP and Rhod-2 fluorescent signals were collected simultaneously. Small cells from the heart of transgenic c-kit-EGFP mice were FACS sorted for EGFP. For  $\text{Ca}^{2+}$  imaging, EGFP-positive CPCs were cultured in a medium containing F12 Kaighn's medium (Gibco) supplemented with 10% FBS (Gibco), bFGF (PeproTech) and LIF (Millipore) (2).

### **Ex Vivo Preparation**

For the analysis of intracellular  $\text{Ca}^{2+}$  in myocytes and CPCs in situ within the myocardium, c-kit-EGFP mice ( $n = 6$ ) were employed (27). Animals were anesthetized with sodium pentobarbital (50 mg/kg body weight, i.p.), and the heart was excised and perfused retrogradely through the aorta with an oxygenated Tyrode solution containing the  $\text{Ca}^{2+}$  indicator Rhod-2 (10  $\mu\text{M}$ ; Invitrogen). Subsequently, the heart was continuously perfused and superfused with an oxygenated Tyrode solution containing cytochalasin D (50 mmol/L; Sigma) to inhibit contraction (1, 24) and placed in a bath mounted on the stage of a two-photon microscope working in line-scan mode. Electrical stimulation was accomplished by depolarizing pulses. The red fluorescence of Rhod-2 was detected in EGFP-positive CPCs and EGFP-negative myocytes.

### **Patch-clamp**

Data were acquired by means of the whole-cell patch-clamp technique in voltage-clamp mode using a Multiclamp 700A amplifier (Axon Instruments). Electrical signals were digitized using a 500 kHz 16-bit resolution A/D converter (Digidata 1322, Axon Instruments) and recorded using pCLAMP 9.0 software (Axon Instruments) with low-pass filtering at 2 kHz (14, 16, 24, 28, 29). Cells were bathed with Tyrode solution containing 1 mmol/L  $\text{CaCl}_2$ . Composition of the pipette solution in mmol/L: NaCl 10, KCl 113,  $\text{MgCl}_2$  0.5,  $\text{K}_2\text{-ATP}$  5, Glucose 5.5, EGTA 5, HEPES 10 (pH 7.2). The pipettes were pulled by means of a glass microelectrode puller (PB-7, Narishige) and when filled had a resistance of 1-3 M $\Omega$ . Current-voltage (I-V) relation for  $I_{\text{CaL}}$  was determined applying depolarizing steps 1 sec in duration from holding potential ( $V_h$ ) -50 mV in 10 mV increments.  $I_{\text{CaL}}$  amplitude was measured as the difference between the peak inward current at the beginning of the step and the current at the end of the 1 sec step (14, 16, 28). Membrane capacitance ( $C_m$ ) was calculated using a 5 mV voltage step and utilized to normalize current recordings (14, 16, 28).

### **Proliferation, Apoptosis and Differentiation Assays**

Proliferation of hCPCs was determined by BrdUrd incorporation (30) while apoptosis was evaluated by Annexin V labeling and flow cytometry. Cells were starved for a 24 h period and then were incubated for 30 min in 200 ng/ml IGF-1 (PeproTech), 100  $\mu\text{mol/L}$  ATP (Sigma), 100  $\mu\text{mol/L}$  histamine (Sigma), 75  $\mu\text{mol/L}$  2-APB (Sigma), 1  $\mu\text{mol/L}$  U-73122 (Sigma), or 10  $\mu\text{mol/L}$  xestospongine-C (Sigma). After washing with PBS, hCPCs were exposed for an additional 24 h to serum-free medium. For proliferation assay, BrdUrd (1  $\mu\text{g/ml}$ ; Roche) was added twice, at the beginning of the experiment and 23 h later. At completion, cells were fixed for 20 min at  $-20^\circ\text{C}$  in a glycine buffer/70% ethanol. BrdUrd incorporation

was determined by immunostaining with monoclonal antibody (Roche). For apoptosis, cells were labeled with Annexin V (Invitrogen) and analyzed by FACS (FACS Aria, Becton Dickinson). hCPC differentiation was induced by MEM containing 10% FBS and  $10^{-8}$  mol/L dexamethasone (Sigma) (1, 2). The effects of  $Ca^{2+}$  oscillations on the commitment of hCPCs to the myocyte lineage was tested by adding 100  $\mu$ mol/L ATP or 100  $\mu$ mol/L histamine to the culture media every 48 h. Cultured cells were analyzed after 1 week by immunocytochemistry.

### **Phospholipase C- $\beta$ 3 siRNA**

For siRNA experiments, ON-TARGET plus siRNA pool (Fisher Scientific) against human PLC- $\beta$ 3 was transfected to hCPCs at the final concentration of 50 nmol/L with N-TER Nanoparticle siRNA Transfection System (Sigma) according to manufacturer instructions. Non-targeting siRNA pool (Fisher Scientific) was utilized for the transfection of control hCPCs. Transfection solution was replaced with the normal medium after 24 h. Transcript levels for PLC- $\beta$ 3 hCPCs were analyzed 3 days after transfection.

### **Myocardial Infarction and Cell Implantation**

Under ketamine (120 mg/kg body weight, i.p.) and xylazine (0.5 mg/kg body weight, i.p.) anesthesia, myocardial infarction was produced in female C57BL/6 mice at 12 weeks of age utilizing a protocol previously described (1, 24, 31). Shortly thereafter, 60,000 EGFP-positive hCPCs, suspended in 10  $\mu$ l PBS in the presence of 1% rhodamine labeled polystyrene microspheres (Invitrogen), were injected in the myocardium in four sites bordering the infarct. Cell tagging was achieved by infecting hCPCs with a lentivirus expressing EGFP under the control of the cytomegalovirus promoter (LentiV-CAG-GFP) (1). Prior to implantation, hCPCs were serum-starved for 24 h followed by 30 min exposure to ATP (100  $\mu$ mol/L) or histamine (100  $\mu$ mol/L). Control cells were kept in serum-free medium only. Untreated mice received injections of PBS. To recognize newly formed cells, mice were treated with BrdUrd (50 mg/kg body weight, i.p., every 12 h) (1, 2, 16, 23, 24, 31). Immunosuppressive regimen consisted of cyclosporine A (Sigma), 50 mg/kg body weight, i.p. daily (1). Mice were sacrificed 48 h and 7 days after hCPC implantation. In a subset of mice, left ventricular hemodynamics (1, 14, 24, 28, 31) was obtained in the closed chest preparation with a MPVS-400 system for small animals (Millar Instruments) equipped with a PVR-1045 catheter. Under sodium pentobarbital (50 mg/kg body weight, i.p.) anesthesia, the right carotid artery was exposed and the pressure transducer was inserted in the carotid artery and advanced in the LV cavity. Data were acquired and analyzed with Chart 5 (ADInstruments) and PVAN softwares. The heart was arrested in diastole and fixed by perfusion with phosphate buffered formalin (1, 2, 14, 23, 24, 31).

For animals sacrificed at 48 h, two transverse sections of the LV which included the sites of injections were obtained for immunolabeling studies. The sites of cell delivery were identified by the presence of rhodamine labeled microspheres. For mice sacrificed at 7 days, base, mid-portion and apex of the LV were processed. Tissue sections 4  $\mu\text{m}$  in thickness were used for immunohistochemistry and were analyzed by epifluorescence (BX51 Olympus microscope) and confocal (IX71 Olympus inverted microscope coupled with a Bio-Rad Radiance 2100 system) microscopy.

To determine the number of EGFP-positive cells in the myocardium (N) the volume occupied by the injected cells (V) was computed assuming an ellipsoid configuration. The volume of EGFP-positive cells ( $V_c$ ) was determined by confocal microscopy. The quotient of these two values yielded the number of engrafted cells:

$$N = V / V_c$$

To determine whether myocardial infarction enhanced the number of c-kit-positive EGFP-positive cells in the heart of c-kit-EGFP transgenic mice, permanent coronary artery occlusion was performed. Animals were sacrificed 48 hours later.

### **Immunocytochemistry**

Formalin-fixed tissue sections, 4  $\mu\text{m}$  in thickness, and paraformaldehyde-fixed cultured hCPCs and myocytes were studied. The antibodies employed and the labeling protocols are listed in Supplemental Table 7. Nuclei were stained by DAPI (Sigma).

### **Quantitative RT-PCR**

RNA was extracted from cultured hCPCs utilizing TRI REAGENT (Sigma) as described previously (1, 16, 24, 30). Human heart total RNA (Applied Biosystems) was utilized as control. cDNA was obtained from 2  $\mu\text{g}$  total RNA in a 20  $\mu\text{l}$  reaction containing Reverse Transcription buffer (Applied Biosystems), 1 mmol/L each of dTTP, dATP, dGTP and dCTP together with 50 U of MultiScribe reverse transcriptase (Applied Biosystems), 20 U of RNase inhibitor (Applied Biosystems) and 100 pmole of oligo-(dT)<sub>15</sub> primer. This mixture was incubated at 37°C for 2 h. Subsequently, real-time RT-PCR was performed with primers (Supplemental Table 8) designed using the Vector NTI Advance 10 software (Invitrogen). The 7300 Real Time PCR system (Applied Biosystems) was employed for quantitative RT-PCR. In each case, 1  $\mu\text{l}$  of cDNA was combined with Power SYBR Green Master Mix (Applied Biosystems) in a 25  $\mu\text{l}$  reaction. Cycling conditions were as follow: 95°C for 10 min followed by 40 cycles of amplification (95°C denaturation for 15 sec, 60°C annealing and extension for 1 min). The melting curve was then

obtained. To avoid the influence of genomic contamination, forward and reverse primers for each gene were located in different exons. PCR products were run on 2% agarose/1x TAE gel to confirm the specificity of the reaction.

### **Statistical Analysis**

The number of experiments performed in each assay (n) has been included in Supplemental Tables 1-5. Data are presented as mean±SEM and statistical significance was determined by two-tailed unpaired Student's *t* test and the analysis of variance and Bonferroni method (32, 33). *P* values of less than < 0.05 were considered to be significant.

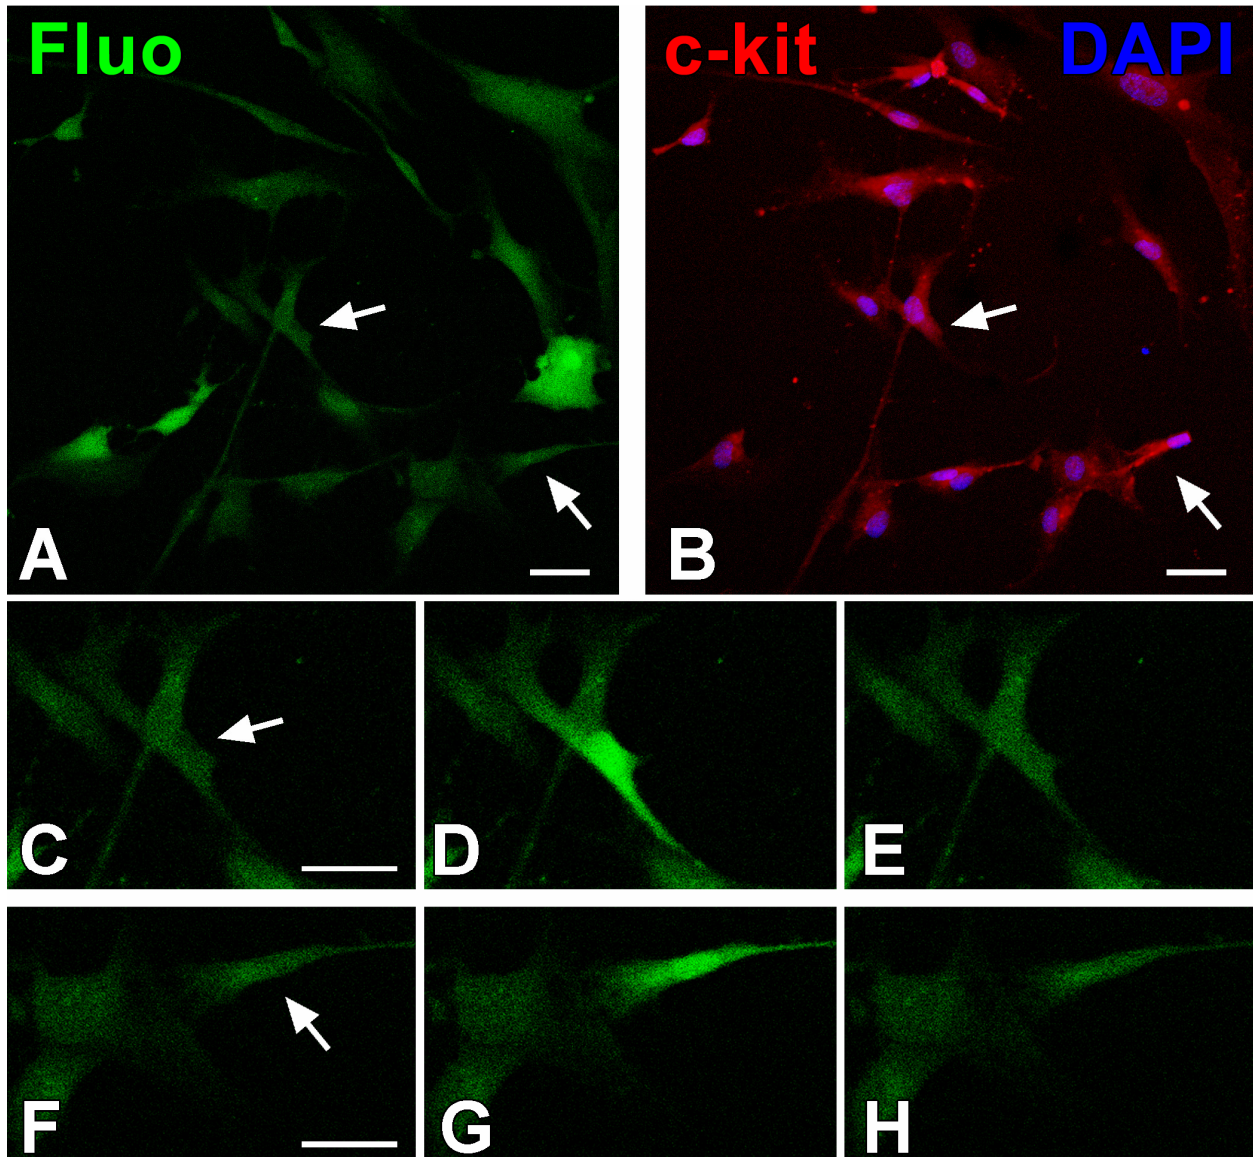

**Figure I.** Intracellular  $\text{Ca}^{2+}$  in c-kit-positive hCPCs. **A-H**, hCPCs loaded with the  $\text{Ca}^{2+}$  sensitive dye Fluo-3 (Fluo, green) (**A**) were monitored for intracellular  $\text{Ca}^{2+}$  oscillations and subsequently fixed and stained (**B**) with DAPI (blue) and c-kit antibody (red). The c-kit receptor was detected in cells (arrows) experiencing  $\text{Ca}^{2+}$  oscillations (**C-E** and **F-H**). Scale bars: 40  $\mu\text{m}$ .



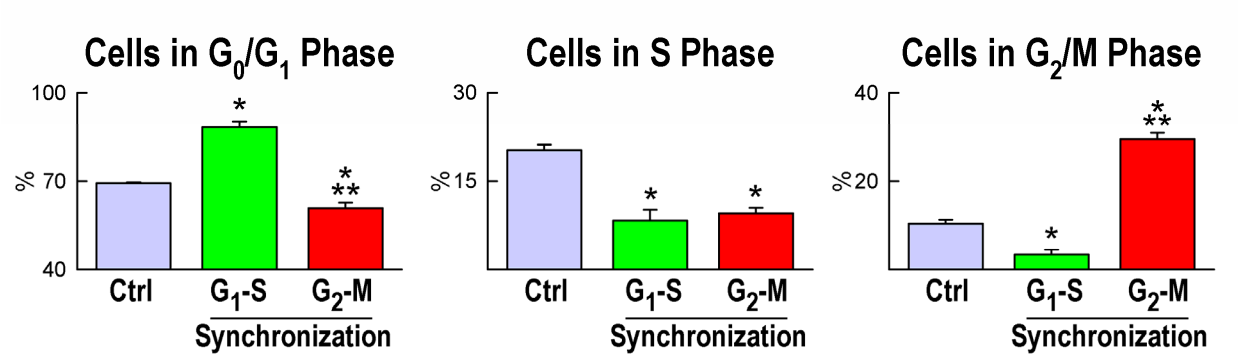

**Figure II.** Synchronization of hCPCs. hCPCs in G<sub>0</sub>/G<sub>1</sub>, S and G<sub>2</sub>/M in control condition (Ctrl, n=10) and at G<sub>1</sub>-S (G<sub>1</sub>-S, n=7) and G<sub>2</sub>-M phase with demecolcine (G<sub>2</sub>-M, n=6).

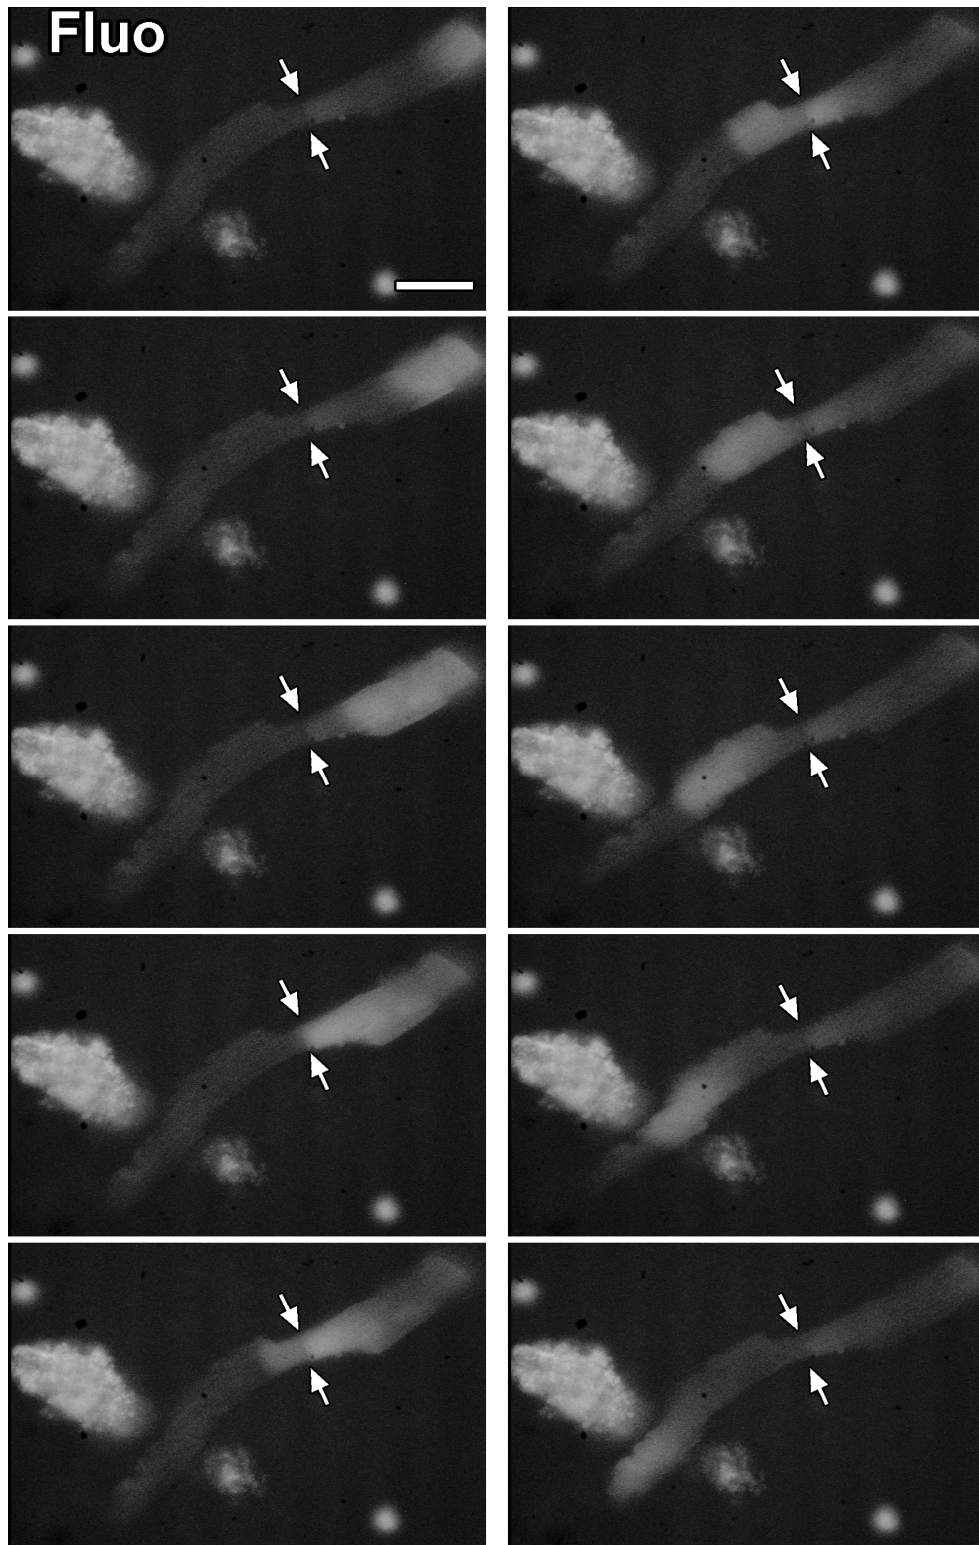

**Figure III.** Propagation of a Ca<sup>2+</sup> wave in a myocyte doublet loaded with Fluo-3. Arrowheads indicate the interface between the two myocytes. Scale bar, 50  $\mu$ m. Images were obtained from Supplemental Movie 1.

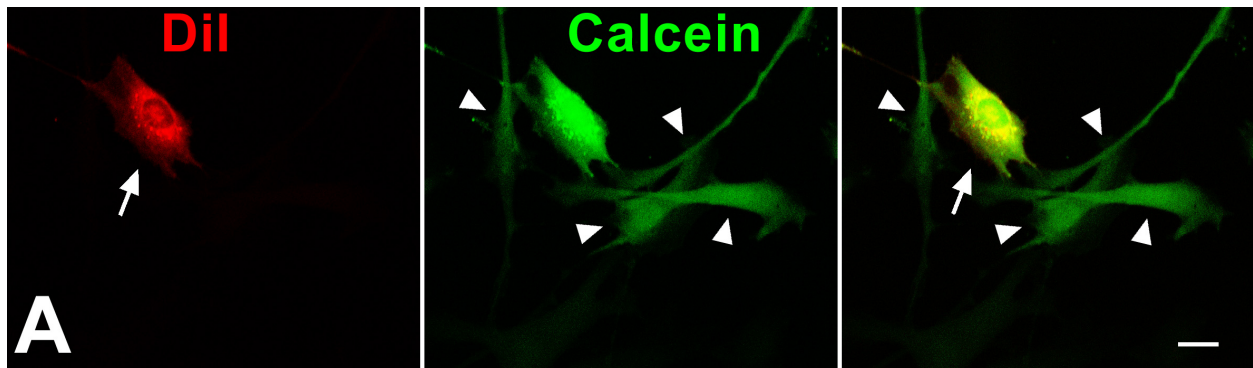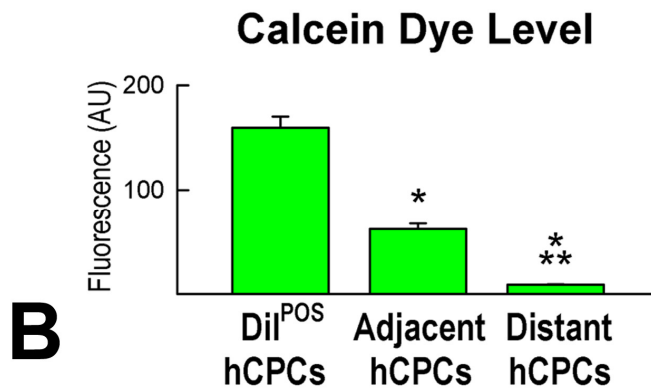

**Figure IV.** Cell-to-cell interaction. **A**, hCPC (arrow) labeled by both DiI (left panel, red) and calcein (central panel, green). Calcein is transferred from the labeled hCPC to adjacent DiI-negative hCPCs (arrowheads, green). The merge of the two dyes is shown in the right panel. Scale bar: 20  $\mu$ m. **B**, Calcein fluorescence in DiI-positive (DiI<sup>POS</sup>) and adjacent and distant DiI-negative hCPCs.

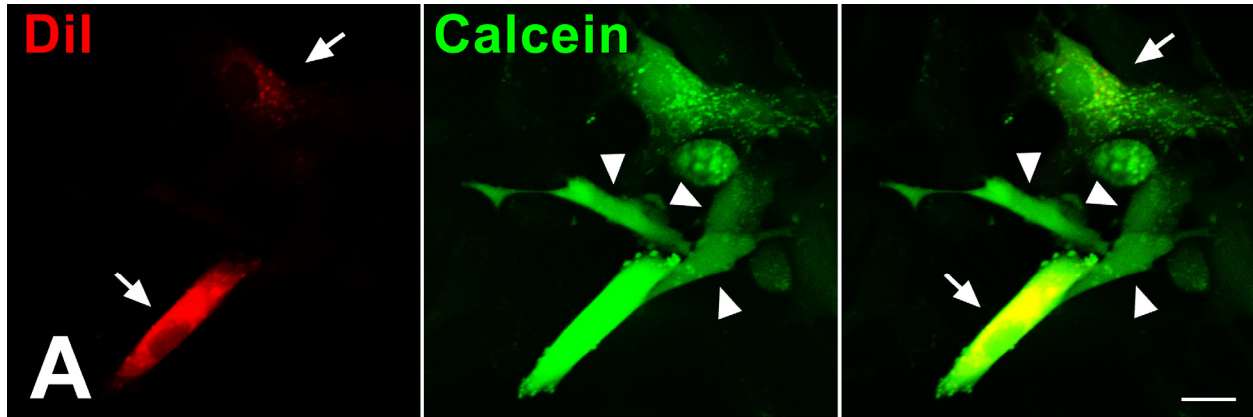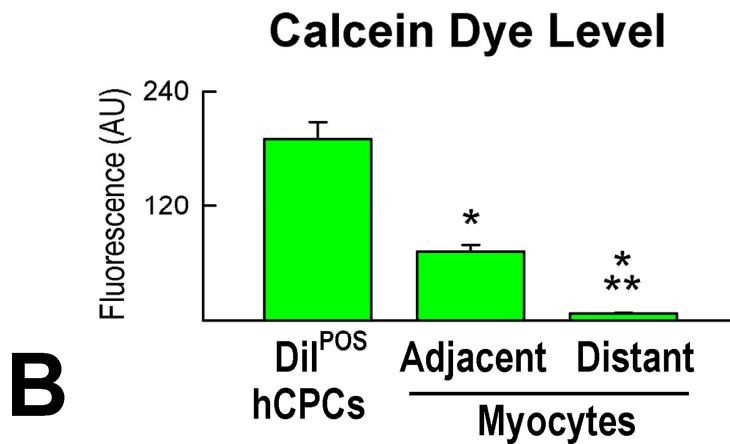

**Figure V.** Cell-to-cell interaction between hCPCs and myocytes. **A**, hCPCs (arrows) labeled by both DiI (left panel, red) and calcein (central panel, green). Calcein is transferred from labeled hCPCs to adjacent DiI-negative neonatal myocytes (arrowheads, green). The merge of the two dyes is shown in the right panel. Scale bar: 20  $\mu$ m. **B**, Calcein fluorescence in DiI-positive (DiI<sup>POS</sup>) and adjacent and distant DiI-negative myocytes.

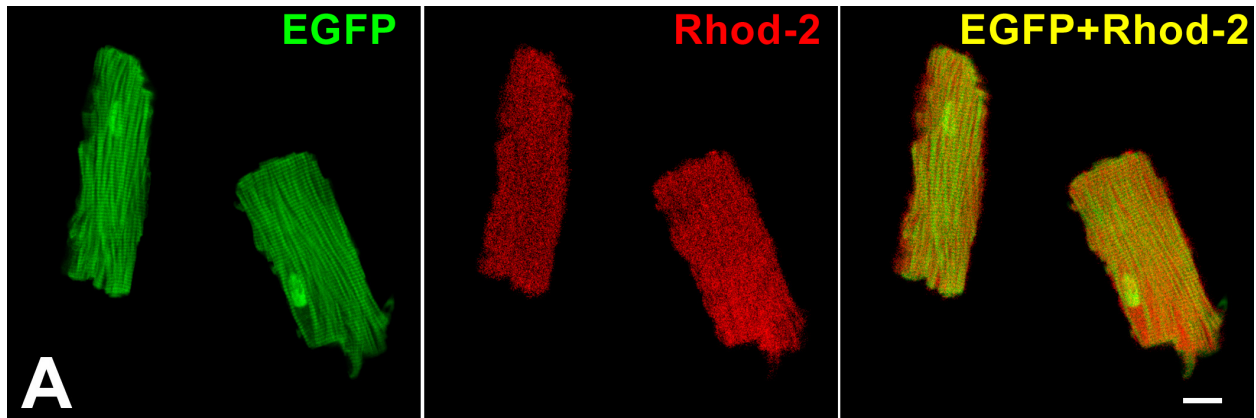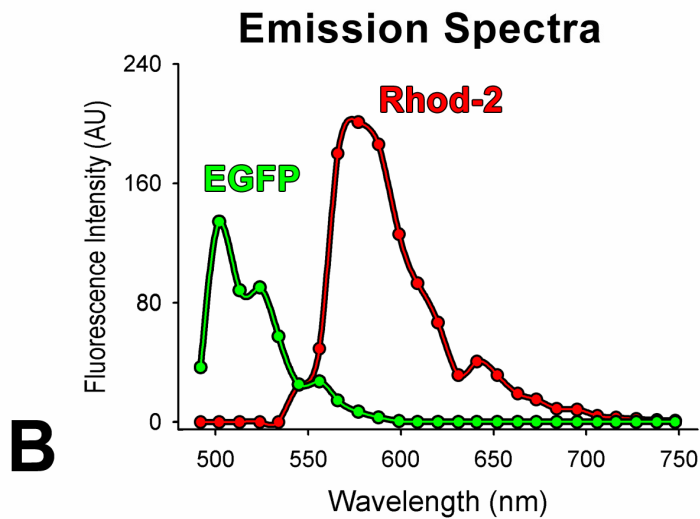

**Figure VI.** Intracellular  $\text{Ca}^{2+}$  in EGFP positive cells. **A**, Cardiomyocytes isolated from transgenic mice in which EGFP is expressed under the control of the  $\alpha$ -myosin heavy chain promoter (MHC-EGFP). Myocytes were loaded with the calcium indicator Rhod-2 and fluorescent signals of the two molecules were examined by spectral analysis. **B**, EGFP and Rhod-2 show separate emission spectra. **C-K**, Myocyte isolated from a MHC-EGFP mouse heart (C, F, I). Following electrical stimulation, EGFP and Rhod-2 signals were acquired and are illustrated together (D) and separately (G and J). The corresponding traces are shown in the lower part of each panel (E, H, K).  $\text{Ca}^{2+}$  transients were obtained in 20 myocytes isolated from 2 transgenic mice. EGFP had minimal, if any, effect on the ability to measure  $\text{Ca}^{2+}$  transients. Scale bars: 20  $\mu\text{m}$ .

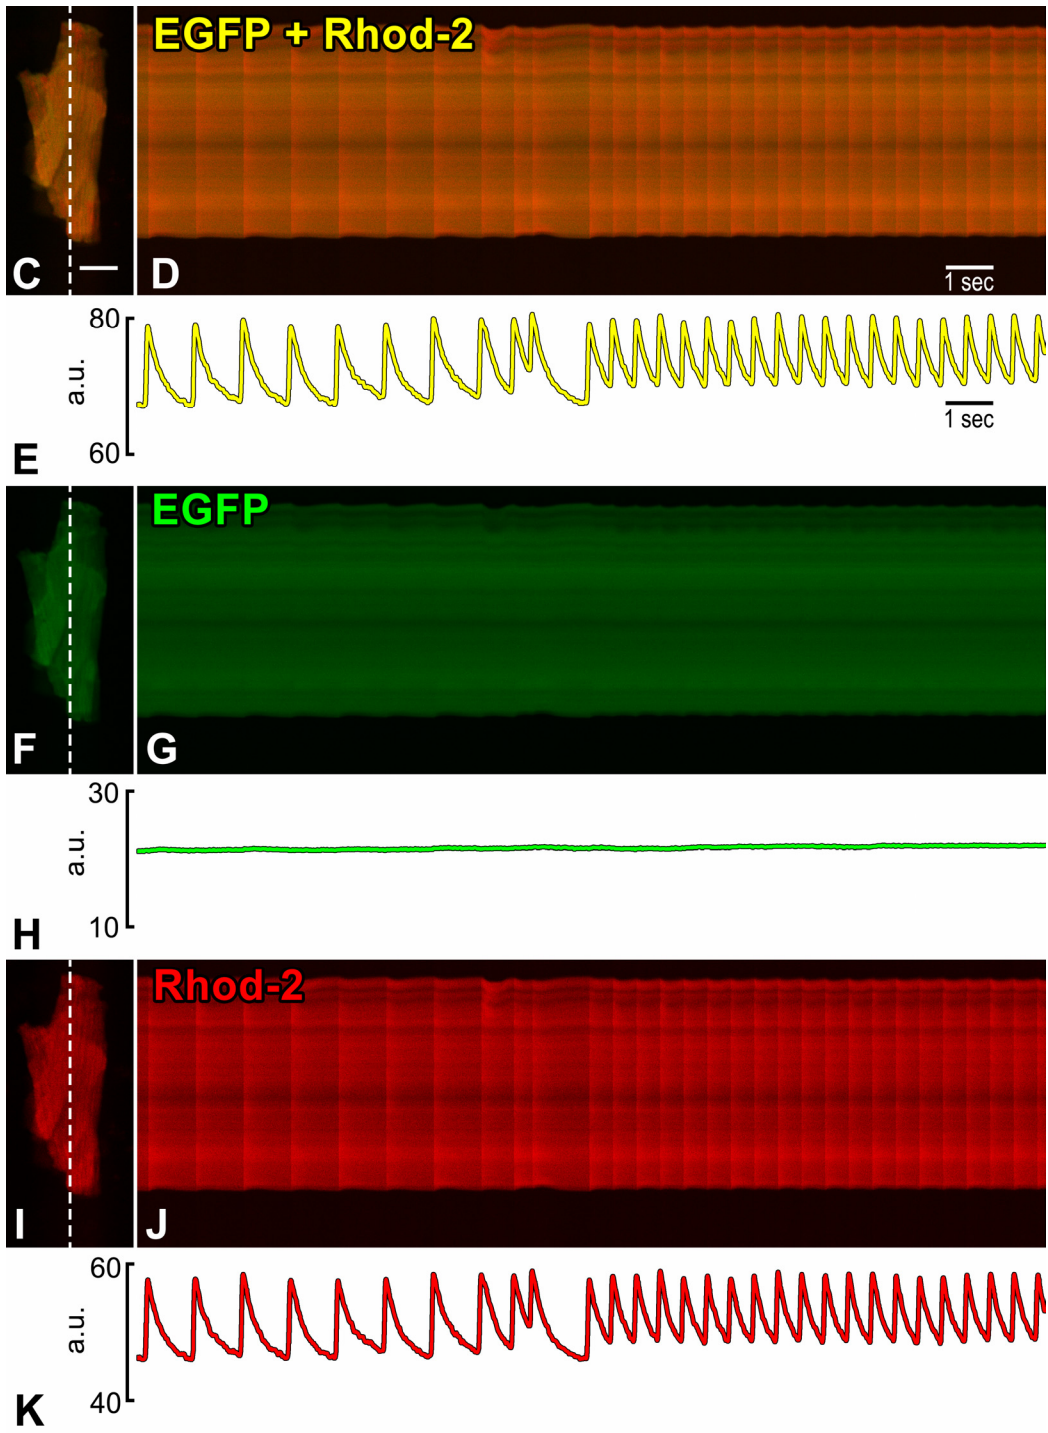

Figure VI. (Continued).

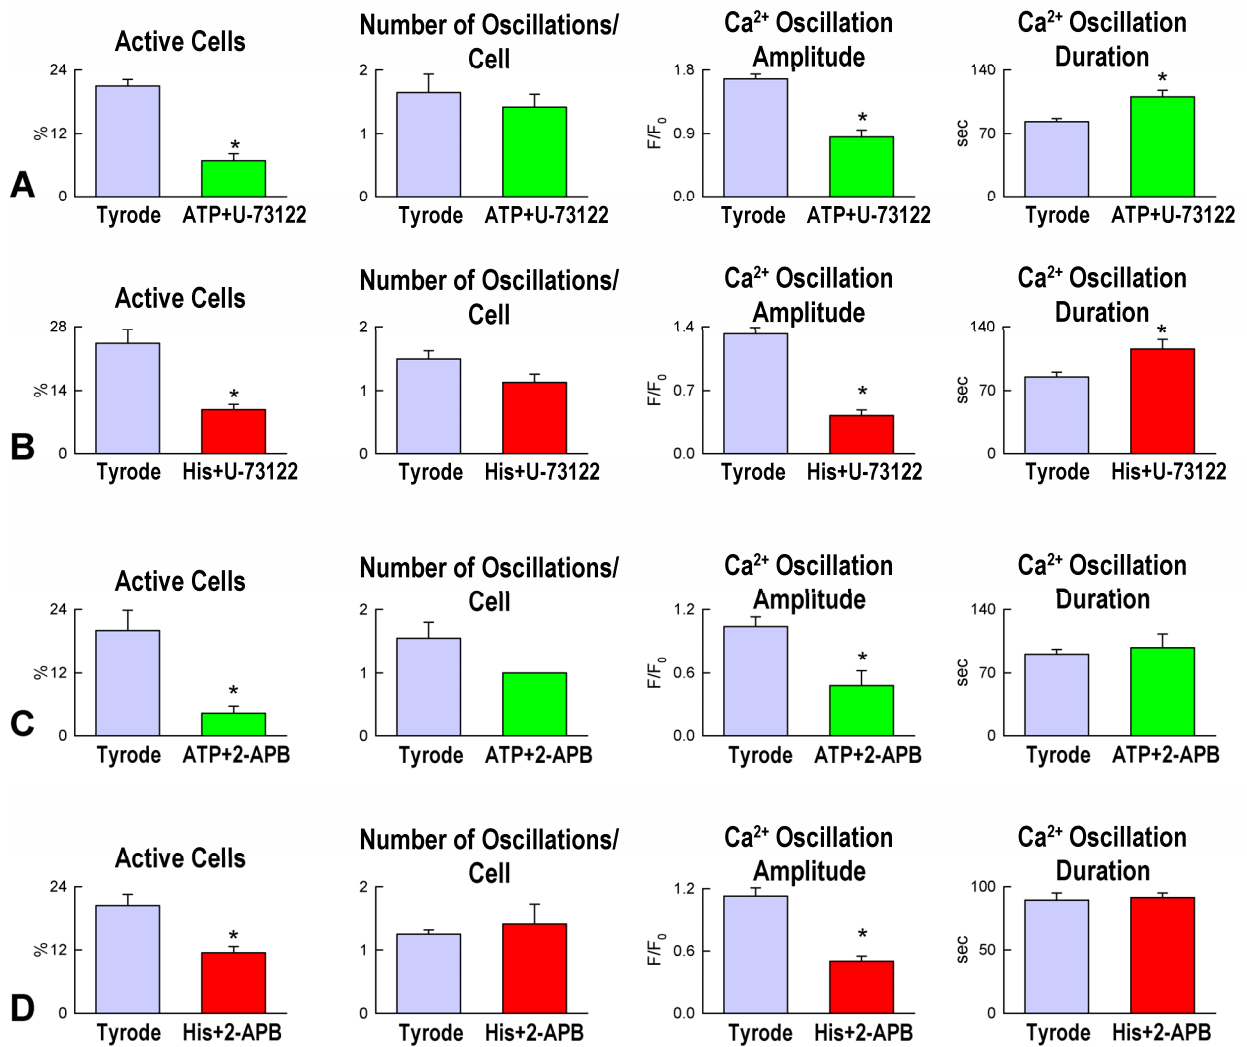

**Figure VII.** Inhibition of the IP<sub>3</sub>-IP<sub>3</sub>R system abrogates the effect of G<sub>q</sub>-protein coupled receptors on Ca<sup>2+</sup> oscillations. **A-D**, Ca<sup>2+</sup> oscillations at baseline and after exposure to ATP or histamine (His) together with PLC inhibitors (**A** and **B**) or IP<sub>3</sub>R blocker (**C** and **D**). Histamine, His. \**P*<0.05 vs. Tyrode.

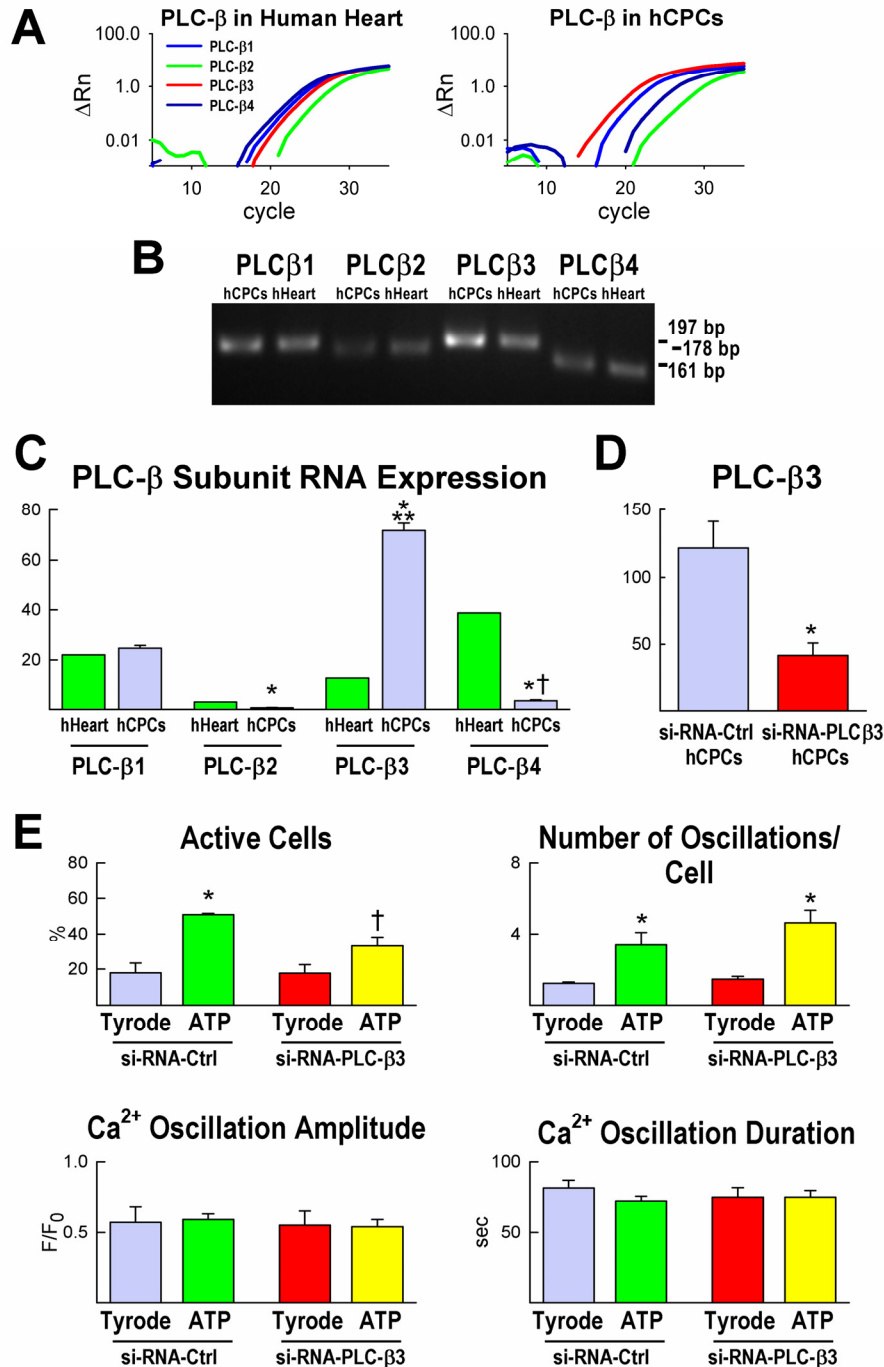

**Figure VIII.** PLC-β3 and ATP-mediated Ca<sup>2+</sup> oscillations in hCPCs. **A-C**, Expression at the mRNA of PLC-β subunits in the human heart (hHeart, n=1) and hCPCs (n=3). **D**, PLC-β3 mRNA was significantly reduced in hCPCs transfected with siRNA against human PLC-β3 (si-RNA-PLC-β3, n=3); control hCPCs were transfected with non-targeting siRNA (si-RNA-Ctrl, n=3). **E**, Ca<sup>2+</sup> oscillations at baseline and after exposure to ATP in si-RNA-Ctrl and si-RNA-PLC-β3 hCPCs. \**P*<0.05 vs. Tyrode, †*P*<0.05 vs. si-RNA-PLC-β3 cells exposed to ATP.



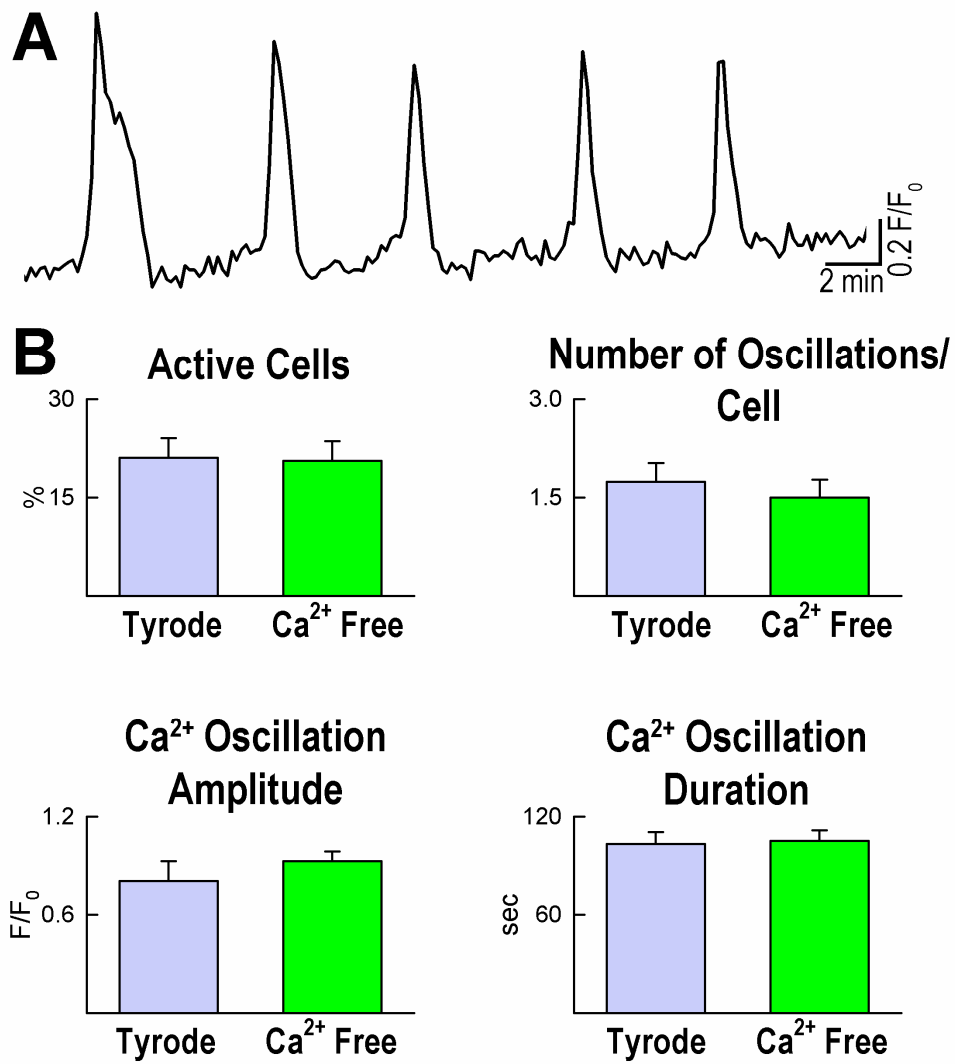

**Figure IX.** A, Ca<sup>2+</sup> oscillations in one hCPC exposed to Ca<sup>2+</sup> free Tyrode solution. B, Ca<sup>2+</sup> oscillations in the presence of 2 mM Ca<sup>2+</sup> and Ca<sup>2+</sup> free Tyrode solutions.

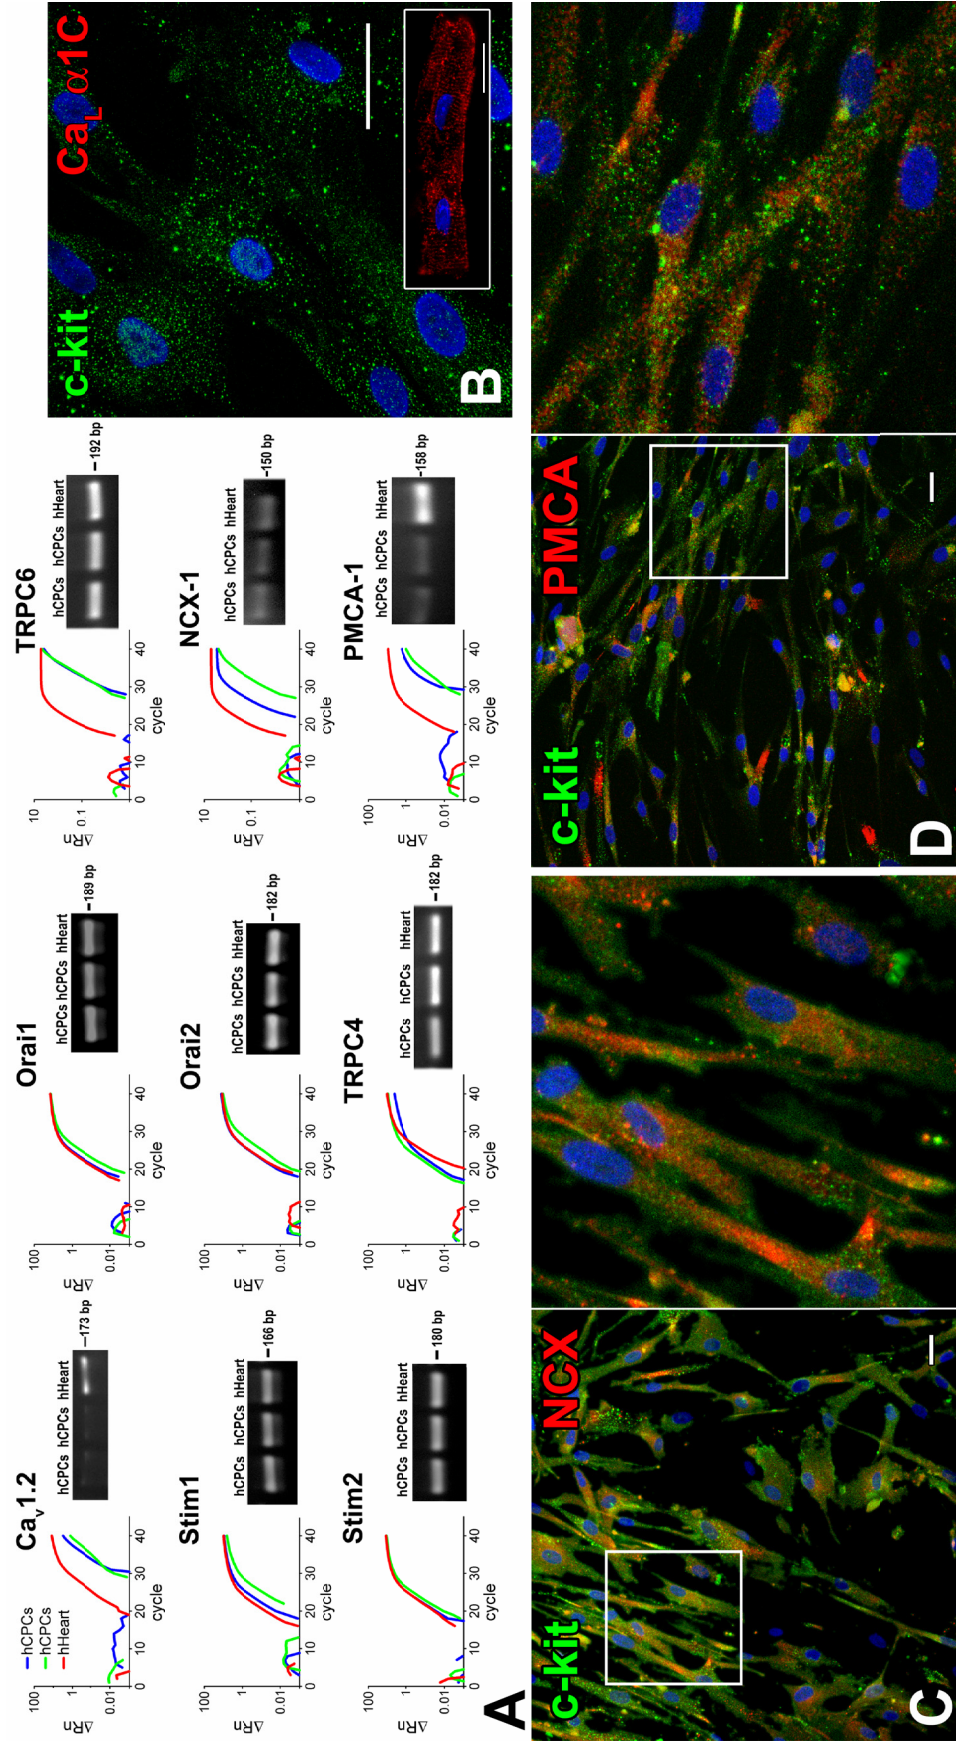

**Figure X.** Plasma membrane Ca<sup>2+</sup> regulatory proteins in hCPCs. **A-D**, Expression at the mRNA (**A**) and protein (**B-D**) levels of systems that may be operative in the regulation of [Ca<sup>2+</sup>]<sub>i</sub> in hCPCs; they include the voltage activated L-type channels, store operated channels (SOC), Na<sup>+</sup>-Ca<sup>2+</sup> exchanger (NCX) and plasma membrane Ca<sup>2+</sup> pump (PMCA). mRNA level of the L-type Ca<sup>2+</sup> channel subunit Ca<sub>v</sub>1.2. was low in hCPCs. Transcripts for Stim (stromal interaction molecule), Orai and TRPCs (transient receptor potential channels) which are the putative molecular substrates for SOC (see refs. 17, 35) were present in hCPCs. NCX and PMCA were also identified in hCPCs at the mRNA and protein levels. Myocytes were used as positive control for L-type Ca<sup>2+</sup> channels. Human heart (hHeart) was used as positive control for mRNA assays. Scale bars: 10 μm.

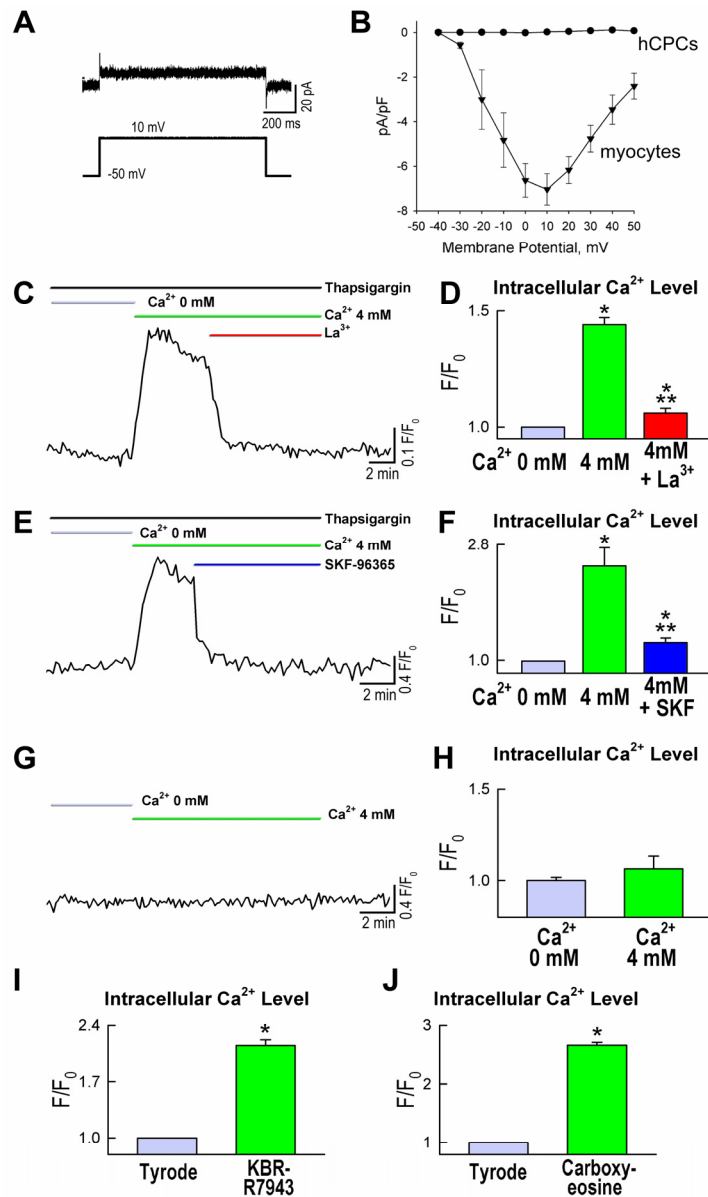

**Figure XI.** Plasma membrane  $\text{Ca}^{2+}$  fluxes in hCPCs. **A** and **B**, L-type  $\text{Ca}^{2+}$  current ( $I_{\text{CaL}}$ ) in hCPCs. Adult mouse myocytes were used as control for this analysis. Depolarizing steps in voltage clamp mode documented the absence of time-dependent voltage activated inward currents at -20 to +50 mV in hCPCs. This corresponds to the range of membrane potentials activating  $I_{\text{CaL}}$ . A depolarizing step to +10 mV applied to an hCPC is illustrated (**A**). Conversely,  $I_{\text{CaL}}$  was clearly present in cardiomyocytes as shown by the current-voltage relations for the two cell types (**B**). These results reflected the modest degree of expression of L-type channel subunit  $\text{Ca}_v1.2$  in hCPCs. **C-F**, The role of SOC in hCPCs was evaluated by monitoring  $[\text{Ca}^{2+}]_i$  and evoking the current by depleting the ER  $\text{Ca}^{2+}$  with thapsigargin (SERCA inhibitor) and rapid increase in extracellular  $\text{Ca}^{2+}$  from 0 to 4 mM (see refs. 4, 11, 17). The parallel increase in intracellular  $\text{Ca}^{2+}$  was inhibited by  $\text{La}^{3+}$  or SKF-96365, blockers of SOC (see refs. 4, 11, 17-20). **G** and **H**, SOC was not activated by the increase in extracellular  $[\text{Ca}^{2+}]$  when SERCA function and  $\text{Ca}^{2+}$  stores were not depleted. \* $P < 0.05$  vs.  $\text{Ca}^{2+}$  0 mM, \*\* $P < 0.05$  vs.  $\text{Ca}^{2+}$  4 mM. **I**, In a comparable manner, the function of NCX in hCPCs was assessed by blocking forward mode NCX and, thereby,  $\text{Ca}^{2+}$  extrusion (see refs. 20, 21). This protocol resulted in an increase in cytosolic  $\text{Ca}^{2+}$ . \* $P < 0.05$  vs. Tyrode. **J**, Similar findings were obtained when the effects of PMCA on  $\text{Ca}^{2+}$  extrusion were abrogated (see refs. 21, 22). \* $P < 0.05$  vs. Tyrode.

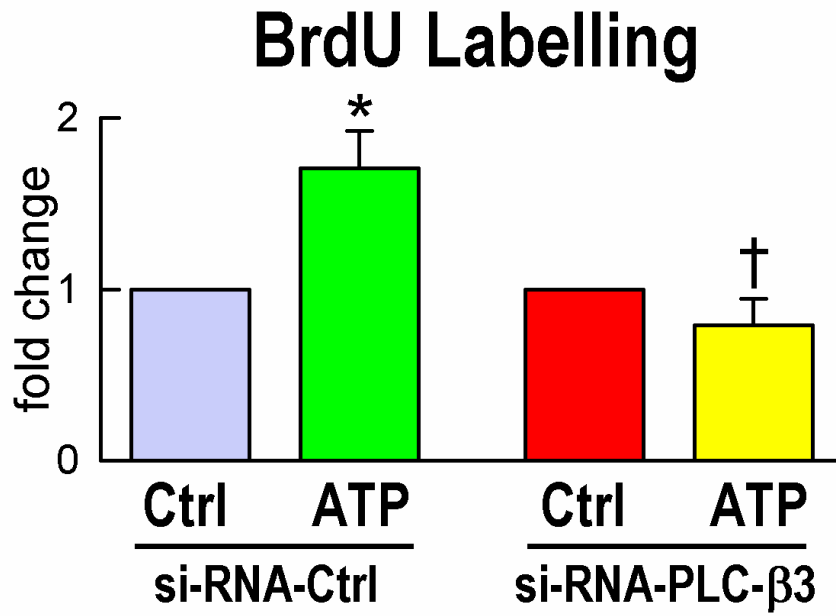

**Figure XII.** PLC-β3, ATP and hCPC proliferation. Stimulation of hCPC growth by ATP was inhibited after downregulation of PLC-β3 subunit. \* $P < 0.05$  vs. Ctrl, † $P < 0.05$  vs. si-RNA-PLC-β3 cells exposed to ATP.

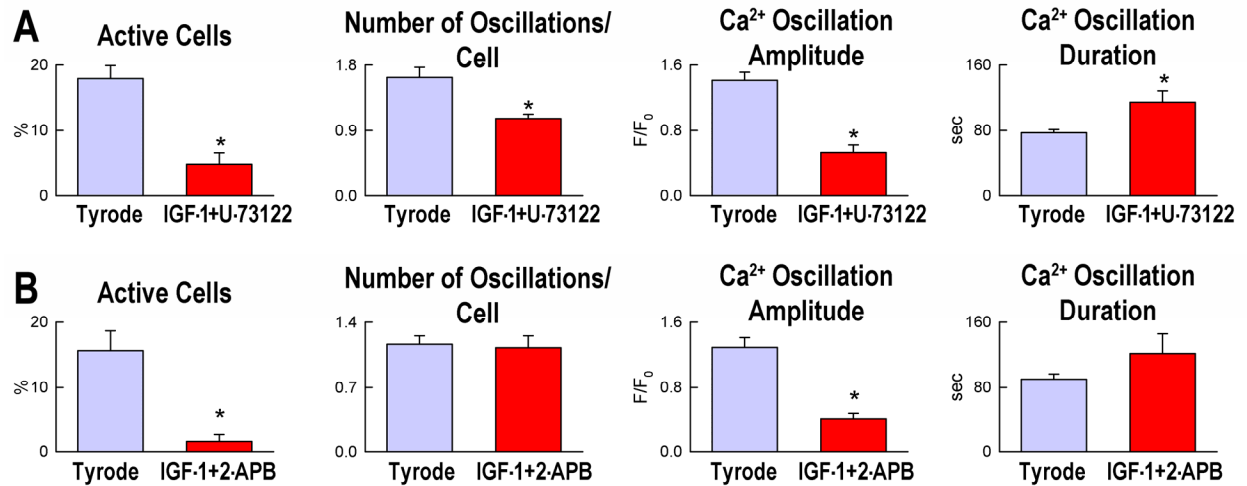

**Figure XIII.** Inhibition of the IP3-IP3R system abrogates the effect of IGF-1 on Ca<sup>2+</sup> oscillations. **A** and **B**, Ca<sup>2+</sup> oscillations in hCPCs at baseline and after exposure to IGF-1 together with inhibition of PLC (**A**) or IP3R (**B**). \**P*<0.05 vs. Tyrode.

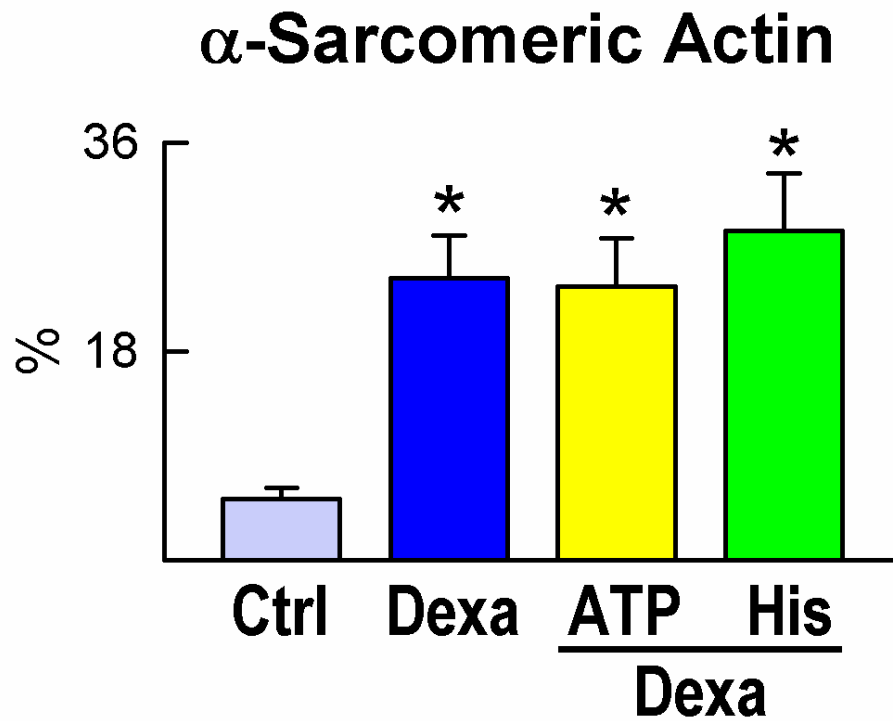

**Figure XIV.**  $\text{Ca}^{2+}$  oscillations and hCPC differentiation. Expression of the myocyte-specific cytoplasmic protein  $\alpha$ -sarcomeric actin in hCPCs exposed to differentiating medium (dexametasone, Dexa) alone or in combination with modulators of  $\text{Ca}^{2+}$  oscillations over a period of 7 days. Cells not exposed to differentiating medium were employed as control (Ctrl). Ctrl, n=12; Dexa, n=12; Dexa + ATP, n=12; Dexa + Histamine, n=12. \* $P < 0.05$  vs. Ctrl.

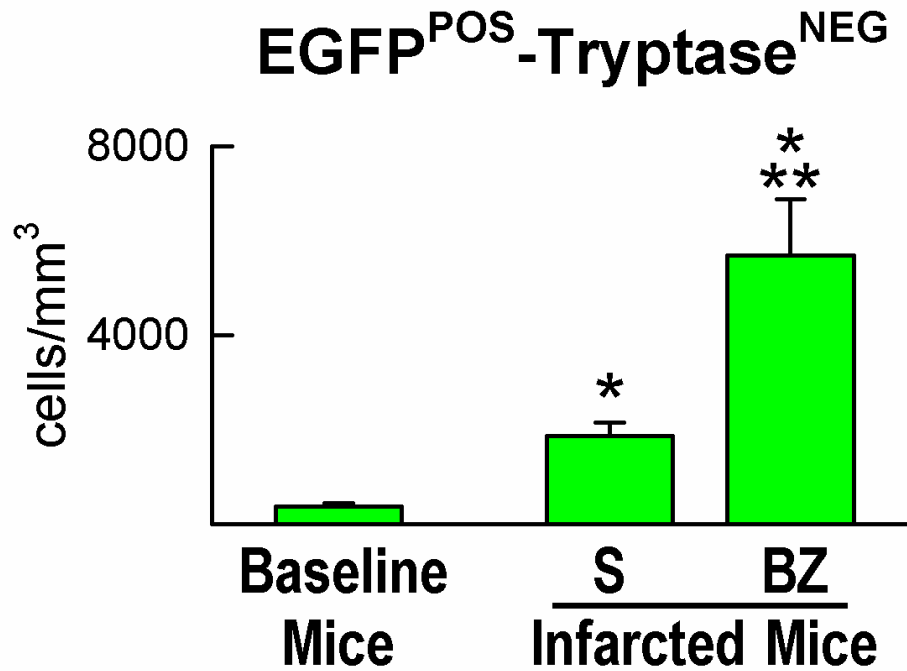

**Figure XV.** Activation of c-kit-positive CPCs after myocardial infarction. For this analysis transgenic mice expressing EGFP under the c-kit promoter were employed. Number of EGFP-positive in the mouse heart at baseline (n=5) and 2 days after myocardial infarction (n=8) in the surviving (S) distant myocardium and in the border zone (BZ). Because of the ongoing inflammatory reaction in the injured myocardium, tryptase staining was performed to exclude mast cells in the computation.

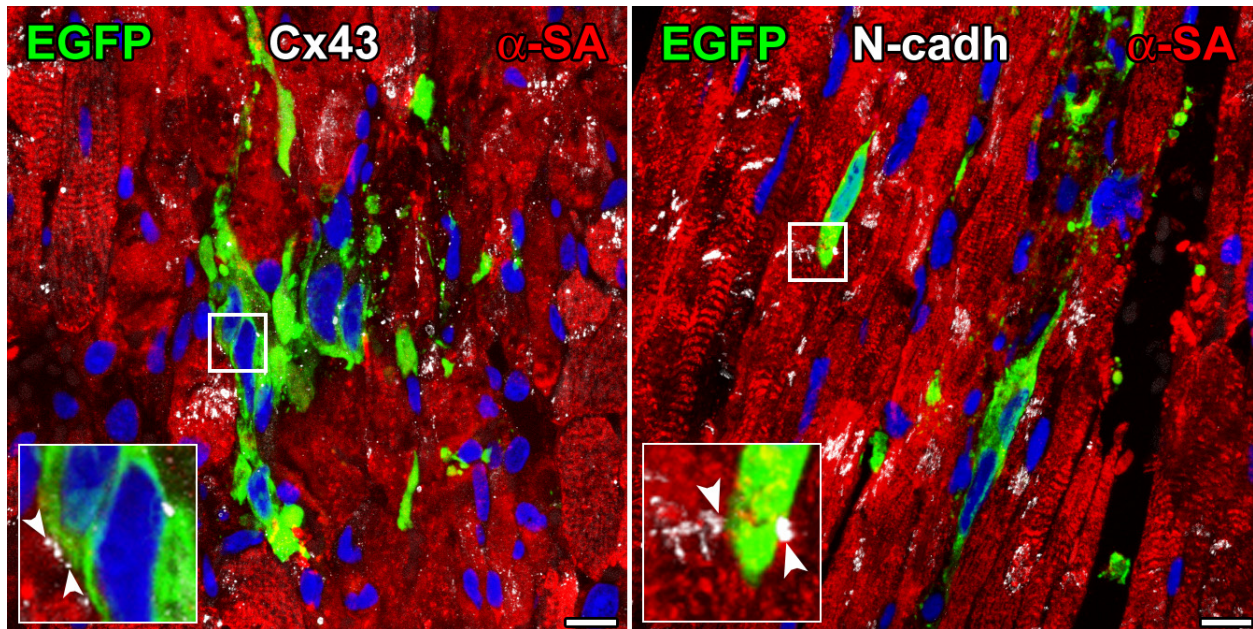

**Figure XVI.** hCPC engraftment. EGFP-positive hCPCs (EGFP, green) 48 hours after implantation in the infarcted mouse heart express connexin 43 (Cx43, white, left panel) and N-cadherin (N-cadh, white, right panel) at their interface with resident spared myocytes ( $\alpha$ -SA, red). Insets show higher magnifications of selected areas. Arrowheads indicate Cx43 (left panel) and N-cadh (right panel) between hCPCs and myocytes. Scale bars: 10  $\mu$ m.



**Supplemental Table 1. Magnitude of sampling for intracellular Ca<sup>2+</sup> imaging**

| Cell type                                     | Experimental condition                                               | Number of tests          | Number of cells                                               | Number of Ca <sup>2+</sup> oscillations | Figure    |
|-----------------------------------------------|----------------------------------------------------------------------|--------------------------|---------------------------------------------------------------|-----------------------------------------|-----------|
| hCPCs                                         | Tyrode                                                               | 95                       | 3676                                                          | 1056                                    | 1B and 1C |
| hCPCs                                         | Tyrode                                                               | 5                        | 101                                                           | n/a                                     | 1D        |
| Non-synchronized hCPCs (Ctrl)                 | Tyrode                                                               | 17                       | 880                                                           | n/a                                     | 1E        |
| G <sub>1</sub> -S synchronized hCPCs          | Tyrode                                                               | 11                       | 453                                                           | n/a                                     |           |
| G <sub>2</sub> -M synchronized hCPCs          | Tyrode                                                               | 13                       | 770                                                           | n/a                                     |           |
| hCPCs                                         | Baseline (Tyrode)                                                    | 3                        | 102                                                           | 22                                      | 2G        |
|                                               | Octanol                                                              |                          | 101                                                           | 31                                      |           |
| Neonatal myocytes                             | Co-culture:<br>No Stimulation,<br>Electrical Stimulation,<br>Cadmium | 3                        | 9, 5, 6                                                       | n/a                                     | 3B, C     |
| Adjacent hCPCs                                |                                                                      |                          | 14, 12, 8                                                     | n/a                                     |           |
| hCPCs                                         | Tyrode                                                               | 5                        | 165                                                           | 61                                      | 3E        |
| mCPCs                                         |                                                                      | 5                        | 186                                                           | 41                                      |           |
| EGFP <sup>POS</sup> -CPCs, Myocytes (ex vivo) | Tyrode                                                               | 6 transgenic mice hearts | 8 fields with the two cell categories and line-scan recording | n/a                                     | 3F        |

|       |                   |   |     |      |                              |
|-------|-------------------|---|-----|------|------------------------------|
| hCPCs | Baseline (Tyrode) | 6 | 261 | 89   | 4F                           |
|       | Thimerosal        |   | 427 | 1493 |                              |
| hCPCs | Baseline (Tyrode) | 7 | 259 | 52   | 4G                           |
|       | 2-APB             |   | 257 | 6    |                              |
| hCPCs | Baseline (Tyrode) | 7 | 166 | 73   | 4G                           |
|       | Xestospongin-C    |   | 149 | 26   |                              |
| hCPCs | Baseline (Tyrode) | 6 | 321 | 121  | 4H                           |
|       | U-73122           |   | 405 | 30   |                              |
| hCPCs | Baseline (Tyrode) | 5 | 264 | 144  | 4J                           |
|       | CPA               |   | 212 | 36   |                              |
| hCPCs | Baseline (Tyrode) | 5 | 92  | 27   | 4L                           |
|       | Ryanodine         |   | 128 | 31   |                              |
| hCPCs | Baseline (Tyrode) | 6 | 254 | 47   | 4M                           |
|       | Caffeine          |   | 255 | 48   |                              |
| hCPCs | Baseline (Tyrode) | 6 | 254 | 51   | 5E                           |
|       | ATP               |   | 283 | 368  |                              |
| hCPCs | Baseline (Tyrode) | 6 | 300 | 100  | 5G                           |
|       | Histamine         |   | 361 | 793  |                              |
| hCPCs | Baseline (Tyrode) | 5 | 217 | 55   | 7I                           |
|       | IGF-1             |   | 252 | 187  |                              |
| hCPCs | Baseline (Tyrode) | 4 | 328 | 114  | Supplemental<br>Figure VII-A |
|       | ATP+U-73122       |   | 303 | 26   |                              |
| hCPCs | Baseline (Tyrode) | 3 | 171 | 64   | Supplemental<br>Figure VII-B |
|       | Histamine+U-73122 |   | 201 | 15   |                              |
| hCPCs | Baseline (Tyrode) | 5 | 146 | 36   | Supplemental<br>Figure VII-C |
|       | ATP+2-APB         |   | 174 | 6    |                              |
| hCPCs | Baseline (Tyrode) | 6 | 259 | 48   | Supplemental<br>Figure VII-D |
|       | Histamine+2-APB   |   | 309 | 48   |                              |

|                                |                         |   |     |     |                               |
|--------------------------------|-------------------------|---|-----|-----|-------------------------------|
| si-RNA-Ctrl<br>hCPCs           | Baseline (Tyrode)       | 3 | 207 | 19  | Supplemental<br>Figure VIII-D |
|                                | ATP                     |   | 226 | 94  |                               |
| si-RNA-PLC-<br>$\beta$ 3 hCPCs | Baseline (Tyrode)       | 3 | 205 | 21  |                               |
|                                | ATP                     |   | 197 | 64  |                               |
| hCPCs                          | Baseline (Tyrode)       | 7 | 105 | 23  | Supplemental<br>Figure IX-B   |
|                                | Ca <sup>2+</sup> free   |   | 111 | 38  |                               |
| hCPCs                          | Lanthanum               | 2 | 70  | n/a | Supplemental<br>Figure XI-D   |
| hCPCs                          | SKF-96365               | 2 | 8   | n/a | Supplemental<br>Figure XI-F   |
| hCPCs                          | Ca <sup>2+</sup> 0-4 mM | 2 | 33  | n/a | Supplemental<br>Figure XI-H   |
| hCPCs                          | KB-R7943                | 4 | 79  | n/a | Supplemental<br>Figure XI-I   |
| hCPCs                          | Carboxyeosine           | 3 | 206 | n/a | Supplemental<br>Figure XI-J   |
| hCPCs                          | Baseline (Tyrode)       | 5 | 242 | 57  | Supplemental<br>Figure XIII-A |
|                                | IGF-1+U-73122           |   | 254 | 11  |                               |
| hCPCs                          | Baseline (Tyrode)       | 6 | 185 | 26  | Supplemental<br>Figure XIII-B |
|                                | IGF-1+2-APB             |   | 224 | 6   |                               |

**Supplemental Table 2. Magnitude of sampling for dye transfer experiments**

| Cell Type                            | Number of cells | Figure                   |
|--------------------------------------|-----------------|--------------------------|
| DiI <sup>POS</sup> hCPCs             | 18              | Supplemental Figure IV-C |
| Adjacent DiI <sup>NEG</sup> hCPCs    | 29              |                          |
| Distant DiI <sup>NEG</sup> hCPCs     | 52              |                          |
| DiI <sup>POS</sup> hCPCs             | 17              | Supplemental Figure V-C  |
| Adjacent DiI <sup>NEG</sup> Myocytes | 16              |                          |
| Distant DiI <sup>NEG</sup> Myocytes  | 32              |                          |

**Supplemental Table 3. Magnitude of sampling for patch-clamp experiments**

| Cell Type      | Number of cells | Figure |
|----------------|-----------------|--------|
| hCPCs          | 8               | 6F     |
| Mouse myocytes | 6               |        |

**Supplemental Table 4. Magnitude of sampling for proliferation assay**

| Cell type | Experimental condition | Number of tests | Figure |
|-----------|------------------------|-----------------|--------|
| hCPCs     | Ctrl                   | 8               | 6A     |
|           | ATP                    | 8               |        |
|           | ATP + 2-APB            | 4               |        |
|           | ATP + U-73122          | 5               |        |
| hCPCs     | Ctrl                   | 10              | 6B     |
|           | Histamine              | 10              |        |
|           | Histamine + 2-APB      | 3               |        |
|           | Histamine + U-73122    | 3               |        |

|                                    |                 |    |                         |
|------------------------------------|-----------------|----|-------------------------|
| hCPCs                              | Ctrl            | 6  | 6C                      |
|                                    | 2-APB           | 6  |                         |
|                                    | Xestospongin-C  | 3  |                         |
|                                    | U-73122         | 6  |                         |
| hCPCs                              | Ctrl            | 12 | 6J                      |
|                                    | IGF-1           | 12 |                         |
|                                    | IGF-1 + 2-APB   | 3  |                         |
|                                    | IGF-1 + U-73122 | 4  |                         |
| si-RNA-Ctrl<br>hCPCs               | Ctrl            | 3  | Supplemental Figure XII |
|                                    | ATP             | 3  |                         |
| si-RNA-<br>PLC- $\beta$ 3<br>hCPCs | Ctrl            | 5  |                         |
|                                    | ATP             | 5  |                         |

**Supplemental Table 5. Magnitude of sampling for apoptosis assay**

| Cell type | Experimental condition | Number of tests | Figure |
|-----------|------------------------|-----------------|--------|
| hCPCs     | Ctrl                   | 3               | 6E     |
|           | ATP                    | 3               |        |
|           | Histamine              | 3               |        |
|           | 2-APB                  | 3               |        |
|           | U-73122                | 3               |        |

**Supplemental Table 6. Magnitude of sampling for implanted cells**

| <b>Parameter</b>        | <b>Group</b>                 | <b>Number of animals</b> | <b>Aggregate sample size</b> | <b>Sample size (mean±SD)</b> | <b>Figure</b> |
|-------------------------|------------------------------|--------------------------|------------------------------|------------------------------|---------------|
| BrdU incorporation      | Control                      | 5                        | 707 cells                    | 141±73                       | 7C            |
|                         | ATP                          | 5                        | 1,711 cells                  | 342±68                       |               |
|                         | Histamine                    | 4                        | 1,683 cells                  | 421±57                       |               |
| Nkx2.5 expression       | Control                      | 5                        | 562 cells                    | 112±36                       | 7C            |
|                         | ATP                          | 5                        | 678 cells                    | 136±74                       |               |
|                         | Histamine                    | 4                        | 1,037 cells                  | 207±94                       |               |
| Myocardial Regeneration | MI+Ctrl-hCPCs                | 8                        |                              |                              | 8B            |
|                         | MI+ATP/His-hCPCs             | 9<br>(ATP, 7;<br>His, 8) |                              |                              |               |
| Myocyte Volume          | MI+Ctrl-hCPCs                | 8                        | 102                          |                              | 8B            |
|                         | MI+ATP/His-hCPCs             | 9<br>(ATP, 7;<br>His, 8) | 207                          |                              |               |
| LV Hemodynamics         | SO                           | 7                        | n/a                          | n/a                          | 8C            |
|                         | MI+PBS                       | 7                        | n/a                          | n/a                          |               |
|                         | MI+Ctrl-hCPCs                | 8                        | n/a                          | n/a                          |               |
|                         | MI+ATP-hCPCs<br>MI+His-hCPCs | 9<br>(ATP, 4;<br>His, 5) | n/a                          | n/a                          |               |

**Supplemental Table 7. Antibodies for immunocytochemistry and immunohistochemistry**

| <b>Protein</b>                      | <b>Antibody</b>   | <b>Detection labelling technique</b> | <b>Company</b> |
|-------------------------------------|-------------------|--------------------------------------|----------------|
| c-kit                               | rabbit polyclonal | Indirect (FITC, Cy5)                 | Santa Cruz     |
| c-kit                               | goat polyclonal   | Indirect (TRITC, Cy5)                | R&D Systems    |
| Connexin 43                         | rabbit polyclonal | Indirect (TRITC, Cy5)                | Sigma          |
| IP3R-I/II/III                       | rabbit polyclonal | Indirect (TRITC, Cy5)                | Santa Cruz     |
| RyR                                 | mouse monoclonal  | Indirect (FITC, Cy5)                 | Sigma          |
| SERCA2                              | goat polyclonal   | Indirect (Cy5)                       | Santa Cruz     |
| NCX                                 | rabbit polyclonal | Indirect (Cy5)                       | Santa Cruz     |
| PMCA                                | mouse monoclonal  | Indirect (Cy5)                       | Sigma          |
| P2Y2                                | rabbit polyclonal | Indirect (FITC, Cy5)                 | Santa Cruz     |
| H1 Receptor                         | rabbit polyclonal | Indirect (Cy5)                       | Sigma          |
| IGF-1-R $\alpha$                    | rabbit polyclonal | Indirect (TRITC, Cy5)                | Santa Cruz     |
| BrdU                                | mouse monoclonal  | Indirect (FITC, TRITC)               | Roche          |
| EGFP                                | rabbit polyclonal | Indirect (FITC, TRITC)               | Invitrogen     |
| EGFP                                | goat polyclonal   | Indirect (FITC, TRITC)               | Abcam          |
| $\alpha$ -sarcomeric actin          | mouse monoclonal  | Indirect (FITC, TRITC)               | Sigma          |
| Nkx 2.5                             | goat polyclonal   | Indirect (TRITC, Cy5)                | Santa Cruz     |
| Tryptase                            | mouse monoclonal  | Indirect (TRITC)                     | Chemicon       |
| N-cadherin                          | rabbit polyclonal | Indirect (TRITC)                     | Santa Cruz     |
| L-type Ca <sup>2+</sup> $\alpha$ 1C | goat polyclonal   | Indirect (FITC, Cy5)                 | Santa Cruz     |

**Supplemental Table 8. Primers used in the real-time RT-PCR for human genes**

| <b>Gene</b>               | <b>Forward primers (5'-3')</b> | <b>Reverse primers (5'-3')</b> |
|---------------------------|--------------------------------|--------------------------------|
| <b>IP3R1</b>              | GAAGAGCACATCAAGGAAGAACAC       | TGCTGACCAATGACATGGCT           |
| <b>IP3R2</b>              | TAGTCCTGGTGAAAGTTAAAGACCC      | CAGACTCATGGTCGATTCCAAC         |
| <b>IP3R3</b>              | TGTACTTCATTGTGCTGGTCCG         | CGAATCTCATTCTGCTCCCC           |
| <b>SERCA2</b>             | CCGTGTCACAGATCCAGAAGAT         | AGGAAAGGGAAGGGGACATG           |
| <b>RyR2</b>               | TACTTCGACACAGTGCCACATGG        | GTTTCCGGAAGCAATCCCCT           |
| <b>NCX-1</b>              | GCTTTCATTGGAGACCTGGC           | GGCGTCTGCATACTGGTCCT           |
| <b>PMCA-1</b>             | TACCTGAGGAGGAATTAGCAGAGG       | AGCCCCCTGAATGGAACCTC           |
| <b>Ca<sub>v</sub> 1.2</b> | CCAGTGAGAACTCAACAGCAGC         | ATCAAGACCGCTTCCACCAG           |
| <b>Orai1</b>              | GTGATGAGCCTCAACGAGCAC          | CACTGAAGGCGATGAGCAGC           |
| <b>Orai2</b>              | GGTCACCTCTAACCACCACTCGGT       | TGAAGGCAATCAGCAGCGGC           |
| <b>Stim1</b>              | TGACTGACGACGTGGATGAC           | CTCATGTGGAGGGAGGACTC           |
| <b>Stim2</b>              | CTCCCCTGATCCAGATATCC           | CGAGGCTTAAAGGAGGAGAC           |
| <b>TRPC4</b>              | TAGGGAGGCGAGCTGCTGAT           | ATCCCAGGACTTCAAAGCGG           |
| <b>TRPC6</b>              | AACAGGTTGGGCACAATAACAAC        | TGTCCTGCTTAATTTCTTCAGTTC       |
| <b>P2Y2</b>               | CCCTTGTGGCAGCAGCACTA           | GCACGGGTTCTCACTCATG            |
| <b>H1</b>                 | AGAAGCAAGCCCTGAGGTCTG          | GGCTGGCCATAGTGGTCTTG           |
| <b>IGF-1</b>              | CCTCAGACAGGCATCGTGGAT          | GCACTCCCTCTACTTGC GTTCTT       |
| <b>PLC-β1</b>             | AGCAGCCCTGATCATGGTTC           | GCGACATCCGTCAACTTTTG           |
| <b>PLC-β2</b>             | CTCCCACATCCAGGAAGTAGTGC        | TGCCTCCAGACCCTTCATCC           |
| <b>PLC-β3</b>             | ACGAGAGGGAGAAGAAGGAGCTG        | AGCCACAAGACGGTCATGCC           |
| <b>PLC-β4</b>             | GAGCACACCAGGCTAAGATTC          | GGACTGCTTCATGGCAAGTC           |
| <b>GAPDH</b>              | GGTCGGAGTCAACGGATTT            | TTCCATTGATGACAAGCTTCC          |



### Supplemental References:

1. Bearzi C, Rota M, Hosoda T, Tillmanns J, Nascimbene A, De Angelis A, Yasuzawa-Amano S, Trofimova I, Siggins RW, Lecapitaine N, Cascapera S, Beltrami AP, D'Alessandro DA, Zias E, Quaini F, Urbanek K, Michler RE, Bolli R, Kajstura J, Leri A, Anversa P. Human cardiac stem cells. *Proc Natl Acad Sci USA*. 2007;104:14068-14073.
2. Beltrami AP, Barlucchi L, Torella D, Baker M, Limana F, Chimenti S, Kasahara H, Rota M, Musso E, Urbanek K, Leri A, Kajstura J, Nadal-Ginard B, Anversa P. Adult cardiac stem cells are multipotent and support myocardial regeneration. *Cell*. 2003;114:763-776.
3. Hung DT, Jamison TF, Schreiber SL. Understanding and controlling the cell cycle with natural products. *Chem Biol*. 1996;3:623-639.
4. Kapur N, Mignery GA, Banach K. Cell cycle-dependent calcium oscillations in mouse embryonic stem cells. *Am J Physiol Cell Physiol*. 2007;292:C1510-C1518.
5. Kawano S, Otsu K, Kuruma A, Shoji S, Yanagida E, Muto Y, Yoshikawa F, Hirayama Y, Mikoshiba K, Furuichi T. ATP autocrine/paracrine signaling induces calcium oscillations and NFAT activation in human mesenchymal stem cells. *Cell Calcium*. 2006;39:313-324.
6. Huettner JE, Lu A, Qu Y, Wu Y, Kim M, McDonald JW. Gap junctions and connexon hemichannels in human embryonic stem cells. *Stem Cells*. 2006;24:1654-1667.
7. Bootman MD, Taylor CW, Berridge MJ. The thiol reagent, thimerosal, evokes  $\text{Ca}^{2+}$  spikes in HeLa cells by sensitizing the inositol 1,4,5-trisphosphate receptor. *J Biol Chem*. 1992;267:25113-25119.
8. Gafni J, Munsch JA, Lam TH, Catlin MC, Costa LG, Molinski TF, Pessah IN. Xestospongins: potent membrane permeable blockers of the inositol 1,4,5-trisphosphate receptor. *Neuron*. 1997;19:723-733.
9. Wu J, Kamimura N, Takeo T, Suga S, Wakui M, Maruyama T, Mikoshiba K. 2-Aminoethoxydiphenyl borate modulates kinetics of intracellular  $\text{Ca}^{2+}$  signals mediated by inositol 1,4,5-trisphosphate-sensitive  $\text{Ca}^{2+}$  stores in single pancreatic acinar cells of mouse. *Mol Pharmacol*. 2000;58:1368-1374.
10. Seidler NW, Jona I, Vegh M, Martonosi A. Cyclopiazonic acid is a specific inhibitor of the  $\text{Ca}^{2+}$ -ATPase of sarcoplasmic reticulum. *J Biol Chem*. 1989;264:17816-17823.
11. Kawano S, Shoji S, Ichinose S, Yamagata K, Tagami M, Hiraoka M. Characterization of  $\text{Ca}^{2+}$  signaling pathways in human mesenchymal stem cells. *Cell Calcium*. 2002;32:165-174.

12. Smith RJ, Sam LM, Justen JM, Bundy GL, Bala GA, Bleasdale JE. Receptor-coupled signal transduction in human polymorphonuclear neutrophils: effects of a novel inhibitor of phospholipase C-dependent processes on cell responsiveness. *J Pharmacol Exp Ther.* 1990;253:688-697.
13. Kapur N, Banach K. Inositol-1,4,5-trisphosphate-mediated spontaneous activity in mouse embryonic stem cell-derived cardiomyocytes. *J Physiol.* 2007;581:1113-1127.
14. Rota M, Boni A, Urbanek K, Padin-Iruegas ME, Kajstura TJ, Fiore G, Kubo H, Sonnenblick EH, Musso E, Houser SR, Leri A, Sussman MA, Anversa P. Nuclear targeting of Akt enhances ventricular function and myocyte contractility. *Circ Res.* 2005;97:1332-1341.
15. Catanzaro JN, Nett MP, Rota M, Vassalle M. On the mechanisms underlying diastolic voltage oscillations in the sinoatrial node. *J Electrocardiol.* 2006;39:342.
16. Rota M, Hosoda T, De Angelis A, Arcarese ML, Esposito G, Rizzi R, Tillmanns J, Tugal D, Musso E, Rimoldi O, Bearzi C, Urbanek K, Anversa P, Leri A, Kajstura J. The young mouse heart is composed of myocytes heterogeneous in age and function. *Circ Res.* 2007;101:387-399.
17. Parekh AB, Putney JW Jr. Store-operated calcium channels. *Physiol Rev.* 2005;85:757-810.
18. Harper JL, Shin Y, Daly JW. Loperamide: a positive modulator for store-operated calcium channels? *Proc Natl Acad Sci USA.* 1997;94:14912-14917.
19. Hunton DL, Lucchesi PA, Pang Y, Cheng X, Dell'Italia LJ, Marchase RB. Capacitative calcium entry contributes to nuclear factor of activated T-cells nuclear translocation and hypertrophy in cardiomyocytes. *J Biol Chem.* 2002;277:14266-14273.
20. Yanagida E, Shoji S, Hirayama Y, Yoshikawa F, Otsu K, Uematsu H, Hiraoka M, Furuichi T, Kawano S. Functional expression of Ca<sup>2+</sup> signaling pathways in mouse embryonic stem cells. *Cell Calcium.* 2004;36:135-146.
21. Iwamoto T, Watano T, Shigekawa M. A novel isothiourea derivative selectively inhibits the reverse mode of Na<sup>+</sup>/Ca<sup>2+</sup> exchange in cells expressing NCX1. *J Biol Chem.* 1996;271:22391-22397.
22. Wanaverbecq N, Marsh SJ, Al-Qatari M, Brown DA. The plasma membrane calcium-ATPase as a major mechanism for intracellular calcium regulation in neurones from the rat superior cervical ganglion. *J Physiol.* 2003;550:83-101.
23. Urbanek K, Cesselli D, Rota M, Nascimbene A, De Angelis A, Hosoda T, Bearzi C, Boni A, Bolli R, Kajstura J, Anversa P, Leri A. Stem cell niches in the adult mouse heart. *Proc Natl Acad Sci USA.* 2006;103:9226-9231.

24. Rota M, Kajstura J, Hosoda T, Bearzi C, Vitale S, Esposito G, Iaffaldano G, Padin-Iruegas ME, Gonzalez A, Rizzi R, Small N, Muraski J, Alvarez R, Chen X, Urbanek K, Bolli R, Houser SR, Leri A, Sussman MA, Anversa P. Bone marrow cells adopt the cardiomyogenic fate in vivo. *Proc Natl Acad Sci USA*. 2007;104:17783-17788.
25. Bevilacqua A, Loch-Carusio R, Erickson RP. Abnormal development and dye coupling produced by antisense RNA to gap junction protein in mouse preimplantation embryos. *Proc Natl Acad Sci USA*. 1989;86:5444-5448.
26. Short AD, Taylor CW. Parathyroid hormone controls the size of the intracellular Ca(2+) stores available to receptors linked to inositol trisphosphate formation. *J Biol Chem*. 2000;275:1807-1813.
27. Cairns LA, Moroni E, Levantini E, Giorgetti A, Klinger FG, Ronzoni S, Tatangelo L, Tiveron C, De Felici M, Dolci S, Magli MC, Giglioni B, Ottolenghi S. Kit regulatory elements required for expression in developing hematopoietic and germ cell lineages. *Blood*. 2003;102:3954-3962.
28. Torella D, Rota M, Nurzynska D, Musso E, Monsen A, Shiraishi I, Zias E, Walsh K, Rosenzweig A, Sussman MA, Urbanek K, Nadal-Ginard B, Kajstura J, Anversa P, Leri A. Cardiac stem cell and myocyte aging, heart failure, and insulin-like growth factor-1 overexpression. *Circ Res*. 2004;94:514-524.
29. Rota M, Vassalle M. Patch-clamp analysis in canine cardiac Purkinje cells of a novel sodium component in the pacemaker range. *J Physiol*. 2003;548:147-165.
30. Gonzalez A, Rota M, Nurzynska D, Misao Y, Tillmanns J, Ojaimi C, Padin-Iruegas ME, Müller P, Esposito G, Bearzi C, Vitale S, Dawn B, Sanganalmath SK, Baker M, Hintze TH, Bolli R, Urbanek K, Hosoda T, Anversa P, Kajstura J, Leri A. Activation of cardiac progenitor cells reverses the failing heart senescent phenotype and prolongs lifespan. *Circ Res*. 2008;102:597-606.
31. Kajstura J, Rota M, Whang B, Cascapera S, Hosoda T, Bearzi C, Nurzynska D, Kasahara H, Zias E, Bonafé M, Nadal-Ginard B, Torella D, Nascimbene A, Quaini F, Urbanek K, Leri A, Anversa P. Bone marrow cells differentiate in cardiac cell lineages after infarction independently of cell fusion. *Circ Res*. 2005;96:127-137.
32. Wallenstein S, Zucker CL, Fleiss JL. Some statistical methods useful in circulation research. *Circ Res*. 1980;47:1-9.
33. Berenson ML, Levine DM, Rindskopf D, eds. Applied statistics, a first course. Englewood Cliffs, New Jersey: Prentice-Hal; 1988.

**34.** Liao Y, Erxleben C, Abramowitz J, Flockerzi V, Zhu MX, Armstrong DL, Birnbaumer L. Functional interactions among Orai1, TRPCs, and STIM1 suggest a STIM-regulated heteromeric Orai/TRPC model for SOCE/Icrac channels. *Proc Natl Acad Sci USA*. 2008;105;2895-2900.

**Legend for Video Files**

**Supplemental Movie 1.** Propagation of a  $\text{Ca}^{2+}$  wave in a myocyte doublet loaded with Fluo-3.
